# Supplementary material for: Exploiting benzilic acid as a modular template: controlling photoreactivity and solid to liquid transition during photodimerization
Source: Royal Society of Chemistry journal article supplement (doi:10.1039/d3cc04257j), 2023-01-01
Supplement: d3cc04257j1.pdf [file d3cc04257j1.pdf]

## Benzilic acid as a template for photodimerization: Melting during photodimerization in a multicomponent solid

Mollah Rohan Ahsan,<sup>a</sup> Lavanya Singh,<sup>a</sup> Harshit Varma,<sup>a</sup> and Arijit Mukherjee \*

Department of Chemistry,  
Birla Institute of Technology and Science (BITS) Pilani, Hyderabad campus  
Hyderabad. 500078, Telangana, India  
Email ID: arijit.mukherjee@hyderabad.bits-pilani.ac.in

| S. No | Title                                                                         | Page  |
|-------|-------------------------------------------------------------------------------|-------|
| S1.   | Synthesis of BZA, 1, 2, 3                                                     | 2-3   |
| S2.   | Characterization of synthesized molecules                                     | 3-6   |
| S3.   | CSD studies                                                                   | 6-11  |
| S4.   | Infrared Spectroscopy                                                         | 11-12 |
| S5.   | Computational calculations                                                    | 12-18 |
| S6.   | Crystallization procedure                                                     | 19    |
| S7.   | Single Crystal X-ray diffraction and packing diagram of 1, 2, 2.BZA and 3.BZA | 19-20 |
| S8.   | Crystallographic Table and Hydrogen Bonding Table                             | 20-23 |
| S9.   | Characterization of bulk samples                                              | 23-27 |
| S10.  | Photoirradiation procedure and images of irradiated crystals                  | 27-28 |
| S11.  | Characterization of photoproducts                                             | 28-39 |
| S12.  | Response to A and B alerts                                                    | 39    |
| S13.  | ORTEP plots                                                                   | 39-40 |

**S1. Compounds used for this study:** The compounds used for this study were benzoic acid (BZA), acridine (ACR), 4-iodopyridine (4-IPy), (E)-4-(3,5-dichlorostyryl) pyridine (**1**), (E)-4-(3-chlorostyryl) pyridine (**2**), (E)-4-(3-bromostyryl) pyridine (**3**). ACR was purchased from Sigma Aldrich, and 4-IPy was purchased from BLD pharm, both compounds were used without further purification. Other compounds were synthesized using the reported procedure. Detailed synthetic techniques and the scheme of the work are discussed below.

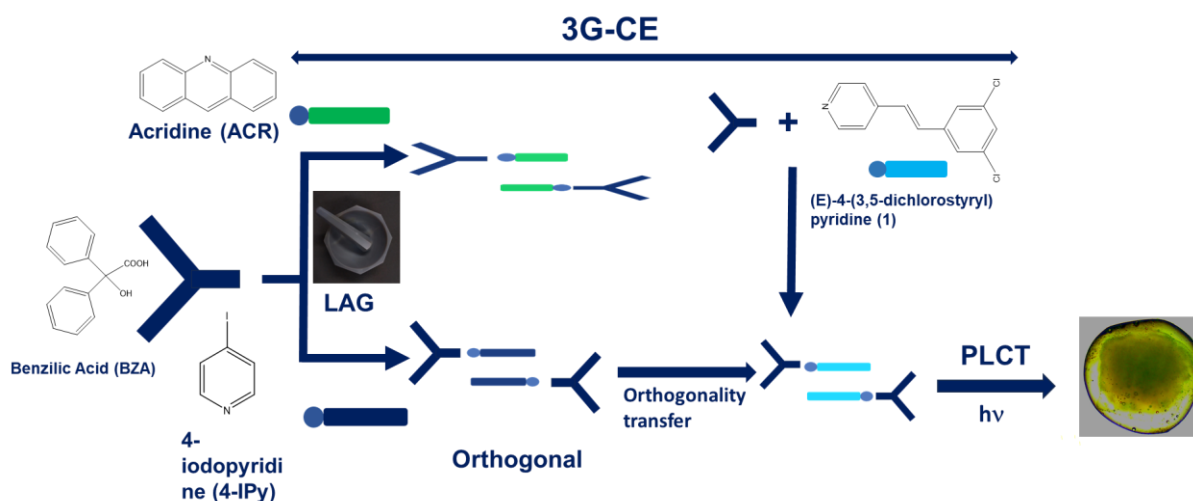

**Scheme 1:** Scheme representing different parts of the work.

### Synthesis of chemical compounds:

**A. Benzoic acid:** Benzoic acid was synthesized using standard laboratory procedures.<sup>1</sup> 3.0 g of benzil and 9.0 mL of 95% ethanol were taken to a 100-mL round-bottom flask. The mixture was heated and stirred until the benzil dissolved. Then, 7.5 mL of an aqueous potassium hydroxide solution was added dropwise to the mixture. The mixture was refluxed for 15-20 minutes with stirring. The crude product was solidified and dissolved in hot water, and concentrated hydrochloric acid was added until the solution became acidic. The brownish-white solid obtained was washed thoroughly with cold water and crystallized from ethanol, and the recrystallized product was used for all the cocrystallization experiments.

**B. (E)-4-(3,5-dichlorostyryl) pyridine (1):** All the 4-styrylpyridines used for this study were synthesized using a reported procedure.<sup>2</sup> 0.95 g of 4-methyl pyridine and 1.75 g of 3,5-dichlorobenzaldehyde was taken in 2 ml of acetic anhydride and stirred at 140° C for 70-72 hours. The product was dissolved in 50-60 mL of dichloromethane after confirming complete conversion was observed through TLC (using 30% EtOAc/hexane solution). The crude product was transferred into a separating funnel. In the next step, 100 ml saturated sodium bicarbonate

solution was added. This process was repeated twice, and then the organic layer was filtered using anhydrous sodium sulfate. The solvent mixture was evaporated and crystallized from a mixture of DCM and hexane for further characterization.

**C. (E)-4-(3-chlorostyryl) pyridine (2):** 0.95 g of 4-methyl pyridine and 1.42g of 3-chlorobenzaldehyde was taken in 2 ml of acetic anhydride and stirred at 140° C for 70-72 hours. The product was dissolved in 50-60 mL of dichloromethane after confirming complete conversion through TLC (using 30% EtOAc/hexane solution). The crude product was transferred to a separating funnel. In the next step, 100 ml saturated sodium bicarbonate solution was added.. This process was repeated twice, and then the organic layer was filtered using anhydrous sodium sulfate. The solvent was evaporated, and a dense, oily liquid was obtained that was crystallized through hexane wash.

**D. (E)-4-(3-bromostyryl) pyridine (3):** 0.95 g of 4-methyl pyridine and 1.75 g of 3-bromobenzaldehyde was taken in 2 ml of acetic anhydride and stirred at 140° C for 70-72 hours. The product was dissolved in 50-60 mL of dichloromethane after confirming complete conversion through TLC (using 30% EtOAc/hexane solution). The crude product was transferred to a separating funnel, and 100 ml saturated sodium bicarbonate solution was added. This process was repeated twice, and then the organic layer was filtered using anhydrous sodium sulfate. The crude product was evaporated and crystallized from the hexane and DCM mixture for further characterization.

## **S2. Characterization of the synthesized compounds:**

**A. <sup>1</sup>H NMR spectra of the synthesized compounds:** ~7 mg of the recrystallized sample was dissolved in CDCl<sub>3</sub>, and NMR data was collected. NMR data confirms the formation of the product.

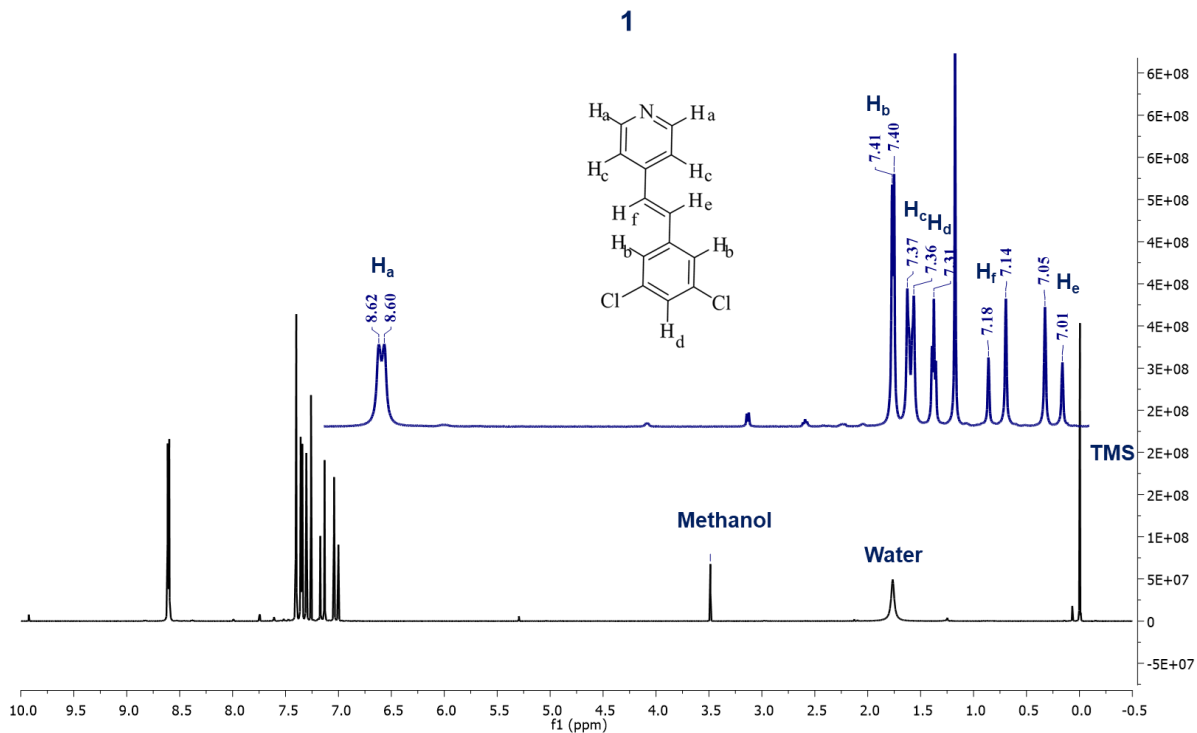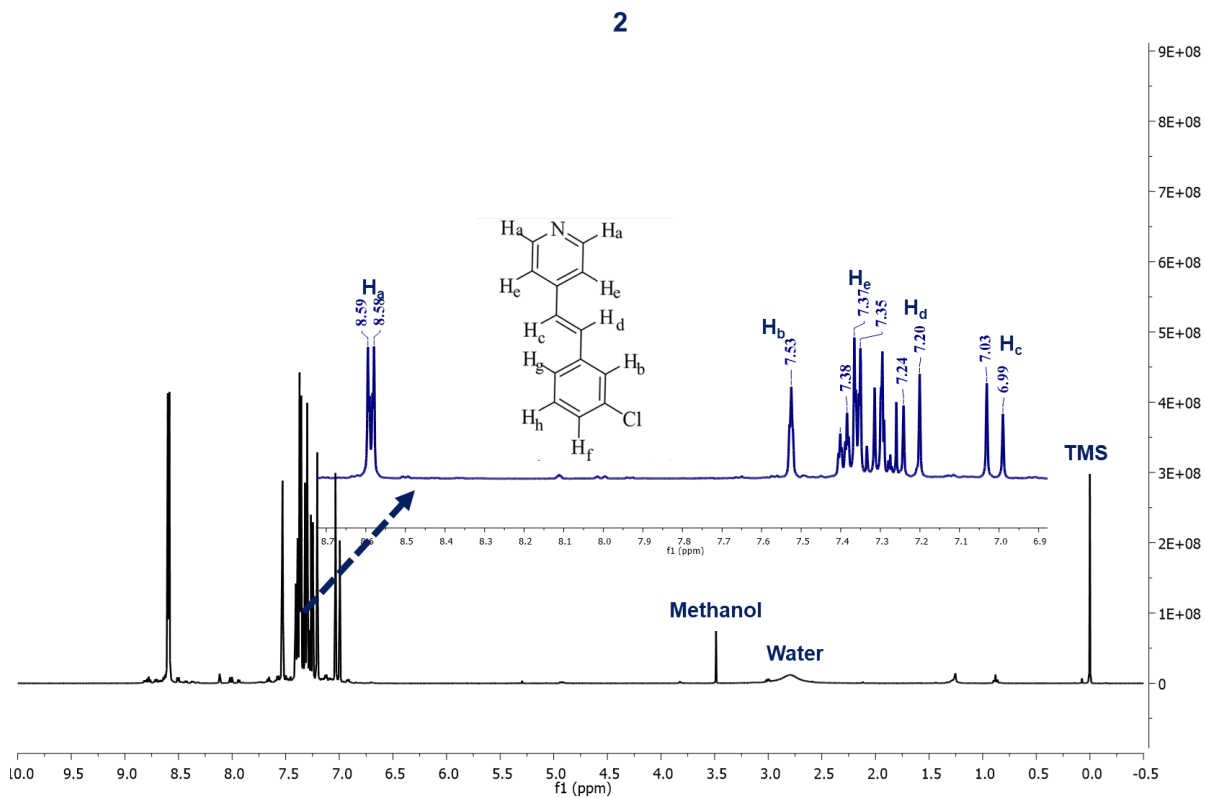

3

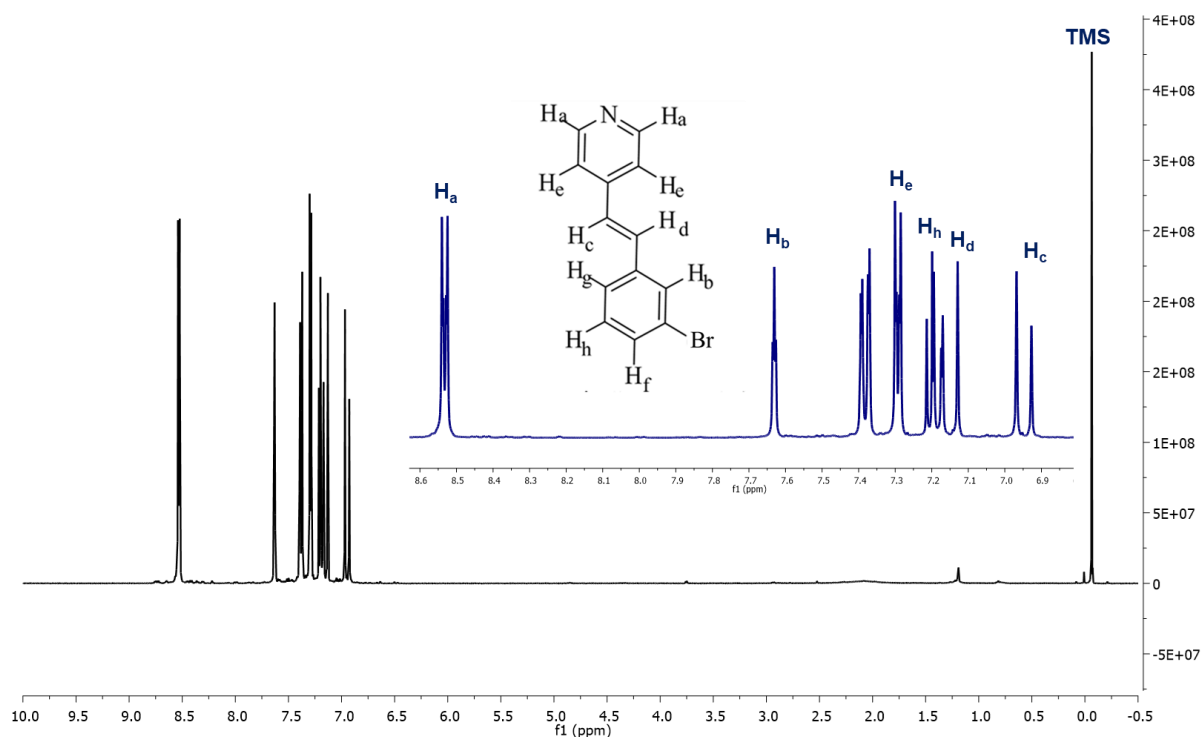

**B. Mass spectra of the synthesized compounds:** A pinch of the crystallized sample was dissolved in methanol, and mass spectra were collected using Shimadzu LCMS 8040. It is shown in the figure that the appearance of the peak in M+1 for all three compounds with nearly 100% abundance confirms the formation of the product.

1

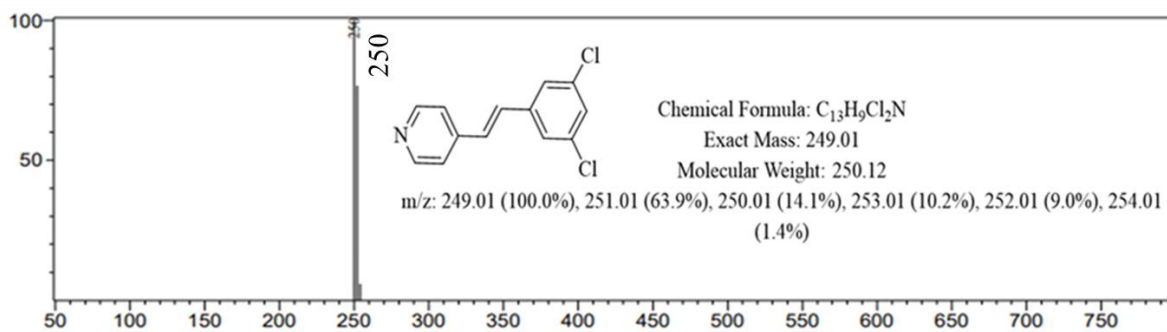

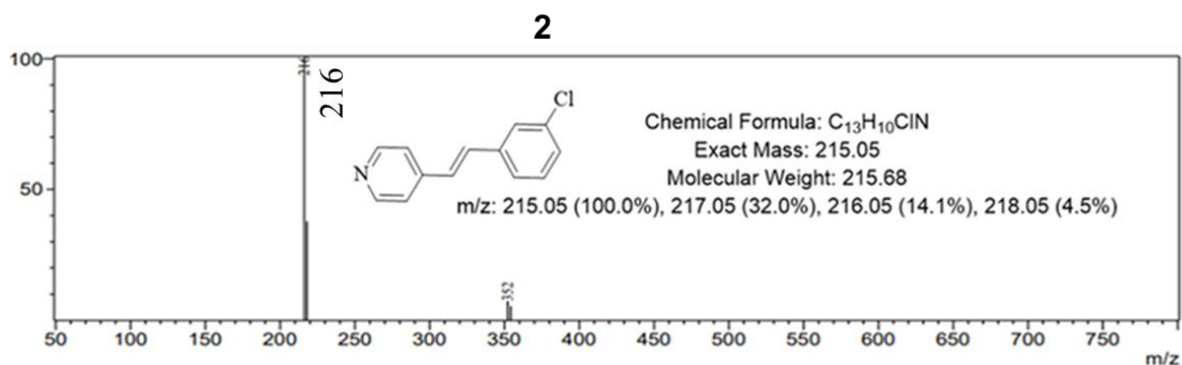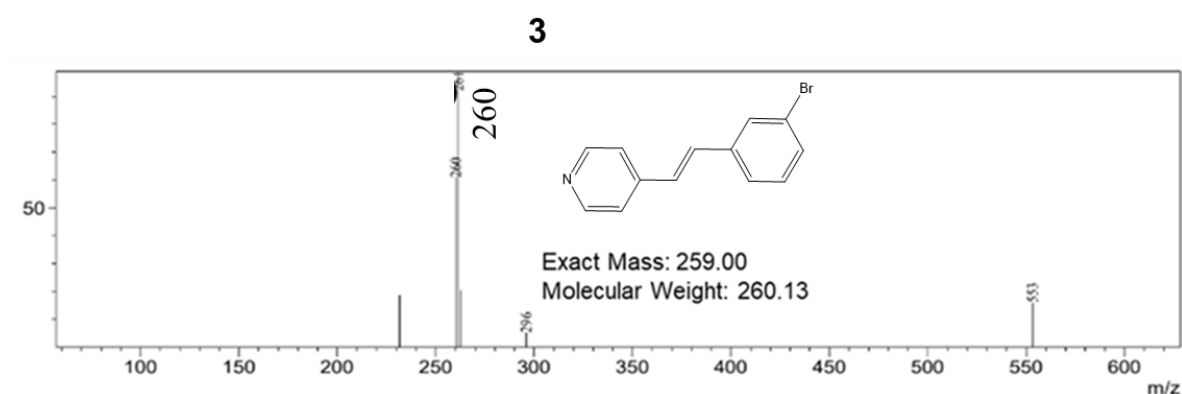

### S3. CSD study:

#### A. CSD search for Benzilic acid cocrystals:

A CSD survey on Benzilic acid was carried out with Conquest 5.43 (November 2022) considering R-factor < 0.75, no polymers, no errors, no powder structures, and with organic structures only. Only three hits were obtained, out of which two were cocrystals. Among these two cocrystals, one forms a hydroxy-amine synthon along with O-H...O synthon with aniline. In another cocrystal system, Benzilic acid forms an O-H...O interaction with Cefradine, and the cocrystal crystallizes with methanol solvate. The reported cocrystals of Benzilic acid are shown below.

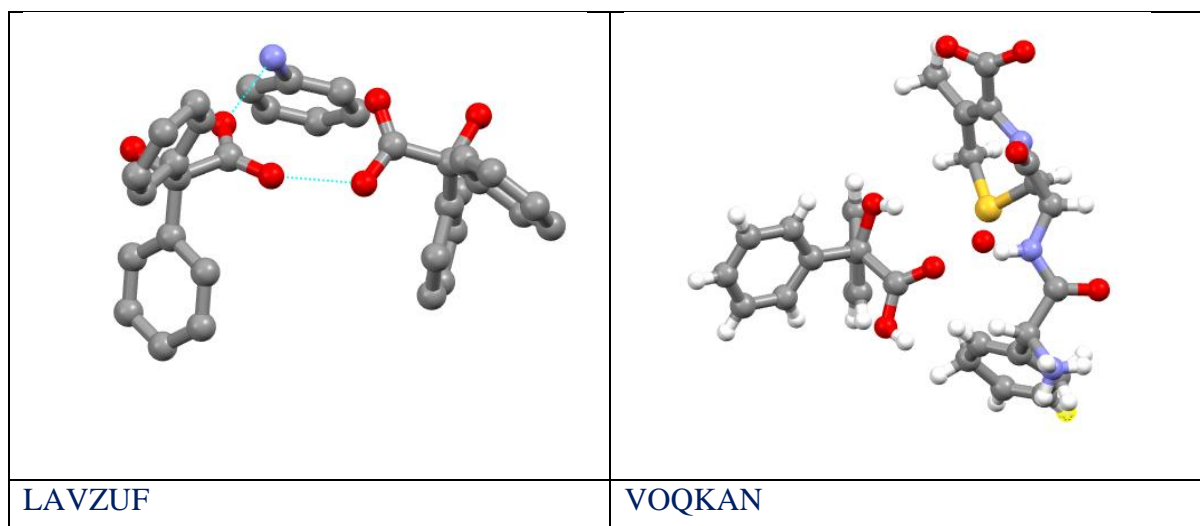

Figure 1: Reported cocrystals of Benzilic acid.

### B. CSD study on 4-styrylpyridines used for photodimerization

Another CSD search was done on 4-styrylpyridines using the same version of CSD using the same criteria used in the previous search (R-factor < 0.75, no polymers, no errors, no powder structures and with organic structures only). Two hundred sixty-seven hits were obtained when we searched for 4-styryl pyridine fixing the hydrogens in the olefinic position. Of these, 119 are single components, 123 are cocrystals or solvated cocrystals, and 25 are solvated native structures. **Amongst 123 cocrystals, 40 cocrystals undergo photochemical reactions.** When a search was done in Conquest 5.43 (November 2022) for 4-styrylpyridinium molecule with R-factor < 0.75, no polymers, no errors, no powder structures, with organic structures only, and with number of molecules >1. 59 hits were obtained, out of which 32 are hydrate or solvate that crystallized with some anion, mostly with Cl<sup>-</sup> anion; out of the remaining 22 are multicomponent crystals or solvated multicomponent crystals (*where at least 2 components are solid in room temperature*), 17 were utilized for photochemical reaction, only 8 cases were found where template strategy utilized successfully. Amongst these 58 cocrystals or salts, only four thiourea, resorcinol derivatives, boronic ester, and 1,2,4,5-benzene tetracarboxylic acids were implemented successfully as a template.

| Ref code | coformer              | styrylpyridine                        |
|----------|-----------------------|---------------------------------------|
| APEDUV   | Thiourea <sup>3</sup> | 1-(4-Pyridyl)-2-(4-                   |
| APEFAD   |                       | cyanophenyl)ethylene                  |
| APEFEH   |                       | 1-(4-Pyridyl)-2-(phenyl)ethylene      |
| APEFIL   |                       | 4-(2-(4-fluorophenyl) vinyl) pyridine |

|                                                          |                                                      |                                                                                                                                                                                                                                                                                       |
|----------------------------------------------------------|------------------------------------------------------|---------------------------------------------------------------------------------------------------------------------------------------------------------------------------------------------------------------------------------------------------------------------------------------|
| APEFOR<br>APEFUX<br>APEGAE<br>APEGEI<br>APEGIM<br>APEGOS |                                                      | 4-(2-(4-Chlorophenyl) vinyl) pyridine<br>4-(2-(4-bromophenyl) vinyl) pyridine<br>4-(2-(4-Methylphenyl)vinyl)pyridine<br>4-(2-(4-Methoxyphenyl)vinyl)pyridine<br>4-(2-(2,4-Dichlorophenyl)vinyl)pyridine<br>1-(4-Pyridyl)-2-(4-ethylphenyl)ethylene<br>4-(2-(2-Naphthyl)vinyl)pyridine |
| GATZIM<br>GAVBEM<br>GAVBIQ<br>GAVBOW                     | 4,6-dibromobenzene-1,3-diol <sup>4</sup>             | bis(Methyl 4-(2-(pyridin-4-yl)vinyl)benzoate                                                                                                                                                                                                                                          |
| GUZTOM08<br>GUZTOM09<br>GUZTOM10<br>GUZTOM11             | 4,6-dichlorobenzene-1,3-diol <sup>5</sup>            | bis(methyl 4-(2-(pyridin-4-yl)vinyl)benzoate)                                                                                                                                                                                                                                         |
| HAFSUF<br>HAGHOP                                         | Urea <sup>6</sup>                                    | 4-(2-(4-Chlorophenyl) vinyl) pyridine<br>1-(4-Pyridyl)-2-(4-cyanophenyl)ethylene                                                                                                                                                                                                      |
| ITODON-<br>ITOFAB                                        | No coformer <sup>7</sup>                             | 1,1'-(ethene-1,2-diyl)bis(2,3,5,6-tetrafluorobenzene) and 4-(2-phenylethenyl)pyridine                                                                                                                                                                                                 |
| ITUJAJ<br>ITUJIR<br>ITUJOX                               | 5-iodobenzene-1,3-diol <sup>8</sup>                  | 4'-(2-Phenylvinyl)-2,2':6',2''-terpyridine<br>benzene-                                                                                                                                                                                                                                |
| KAQCOW-<br>KAQCUC                                        | resorcinol <sup>9</sup>                              | 4-(2-(4-methylphenyl)vinyl)pyridine<br>4-[2-(4-chlorophenyl)ethenyl]pyridine                                                                                                                                                                                                          |
| NOTFOU<br>NOTFOU01<br>NOTFOU02<br>NOTFOU03<br>NOTFOU04   | (1,2,4,5-tetrachloro-3,6-diodobenzene) <sup>10</sup> | 1-(4-Pyridyl)-2-(phenyl)ethylene                                                                                                                                                                                                                                                      |
| POWREB                                                   | 4,6-diiodobenzene-1,3-diol <sup>11</sup>             | bis(4-[2-(pyridin-4-yl)ethenyl]phenyl) acetate                                                                                                                                                                                                                                        |



|          |                                                     |                                         |
|----------|-----------------------------------------------------|-----------------------------------------|
| VIVXIK   | 4,6-dibromobenzene-1,3-diol                         | 1-(4-Pyridyl)-2-(phenyl)ethylene        |
| VIVXOQ   | 4,6-dichlorobenzene-1,3-diol                        |                                         |
| VIVXUW   | (solid solution) <sup>12</sup>                      |                                         |
| YICLAA   | 4,6-dichlorobenzene-1,3-diol <sup>13</sup>          | 1-(4-Pyridyl)-2-(phenyl)ethylene        |
| YIXKUO   | Boronic Ester <sup>14,15</sup>                      | 1-(4-Pyridyl)-2-(phenyl)ethylene        |
| JUTLUI   |                                                     | 1-(4-pyridyl)-2-(2-thienyl)ethylene     |
| ABELOI   | 5-methoxyresorcinol <sup>16</sup>                   | 1,4-bis(2-(4-pyridyl)ethenyl)benzene    |
|          |                                                     |                                         |
| TEXBEG   | 1,2,4,5-benzene                                     | 4-[2-(4-cyanophenyl)ethenyl]pyridin-1-  |
| TEXBOQ   | tetracarboxylic acids <sup>17</sup>                 | ium)                                    |
| TEXBUW   |                                                     | 4-[2-(2,4-                              |
| TEXCAD   |                                                     | dichlorophenyl)ethenyl]pyridin-1-ium    |
| TEXCIL   |                                                     | 4-[2-(3-bromophenyl)ethenyl]pyridin-1-  |
| TEXCOR   |                                                     | ium)                                    |
| TEXCOR01 |                                                     | 4-[2-(4-bromophenyl)ethenyl]pyridin-1-  |
| TEXBAC01 |                                                     | ium                                     |
| RACSUL   |                                                     | 4-[2-(2-cyanophenyl)ethenyl]pyridin-1-  |
|          |                                                     | ium                                     |
|          |                                                     | 4-[2-(2-chlorophenyl)ethenyl]pyridin-1- |
|          |                                                     | ium                                     |
|          |                                                     | 4-[2-(2-chlorophenyl)ethenyl]pyridin-1- |
|          |                                                     | ium                                     |
|          |                                                     | 4-[2-(3-chlorophenyl)ethenyl]pyridin-1- |
|          |                                                     | ium                                     |
|          |                                                     | 1-Phenyl-2-(pyridin-1-ium-4-yl)ethene   |
| UDISOS   | 4-carboxy-2,3,5,6-tetrafluorobenzoate <sup>18</sup> | 4-[2-(naphthalene-1-yl)ethenyl]pyridin- |
|          |                                                     | 1-ium                                   |
| ILAPOD   | 2,3,5,6-tetrafluorobenzoate <sup>19</sup>           | 4-[2-(naphthalene-1-yl)ethenyl]pyridin- |
|          |                                                     | 1-ium                                   |
| ILAPIX   | 2,3,5,6-tetrafluoro-4-hydroxybenzoate <sup>19</sup> |                                         |

|                    |                                                         |                                                                |
|--------------------|---------------------------------------------------------|----------------------------------------------------------------|
| DUQWUK             | (1-oxo-1H-2-benzopyran-3-carboxylic acid) <sup>20</sup> | 1,8-bis(4-pyridinioethenyl)naphthalene                         |
| WULZUB<br>WUKFIU   | Oxalic acid <sup>21</sup>                               | 4-(2-phenylethenyl)pyridinium<br>4-(2-phenylethenyl)pyridinium |
| UMEDIC<br>UMEDIC01 | hexafluorophosphate <sup>22</sup>                       | 4-(2-phenylethenyl)pyridinium<br>4-(2-phenylethenyl)pyridinium |

### C. Studying torsional preference (C-N···O-C) in pyridine derivatives and acridine while cocrystallized with a cofomer

Varying torsional preference was observed for pyridine and acridine moiety when we searched in CSD. When a search was performed for cocrystals with acid-pyridine synthon for the torsion angle (C-O···N-C) and contact N···H by considering R-factor < 0.75, no polymers, no errors, no powder structures, and with organic structures only, 2052 hits were obtained. When the obtained structures were plotted with Torsion vs. Distance (N···H), the torsional angle was concentrated at 0° and 180°, which defines that carboxylic acid prefers planar orientation for pyridine moieties. Then, another search was performed for cocrystals of acridine having acid pyridine synthon for torsional preferences without adding hydrogen to the backbone of acridine. 32 hits were obtained, out of which only 7 are within the range of 0-50 and 130-180; the rest preferred orthogonal or near orthogonal orientation. Similar fondness of torsional angle was observed for carboxylate-pyridinium and carboxylate-acridinium synthons.

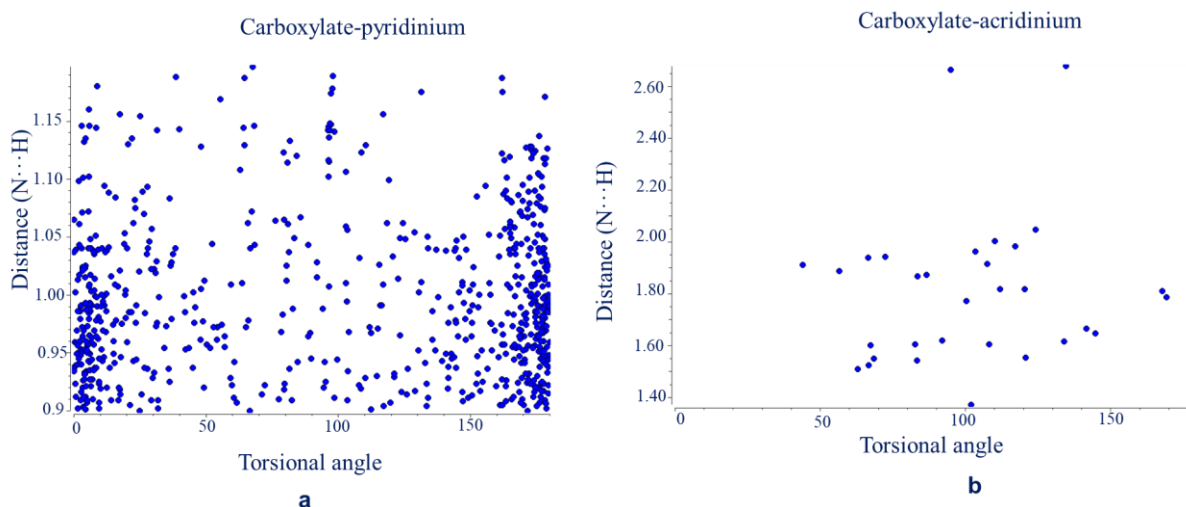

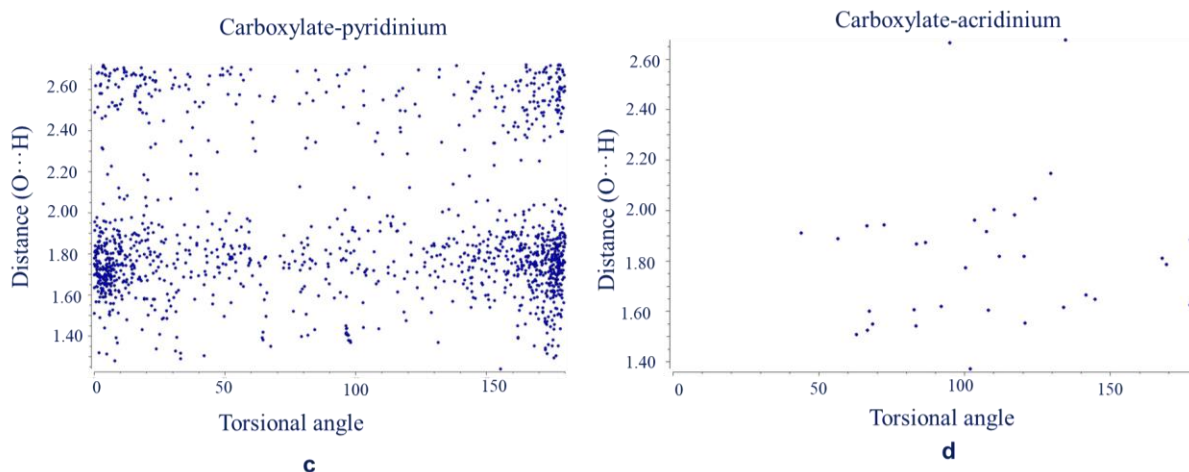

Figure 2: Scatter plot of torsion C-N-O-C vs contact (N...H and O...H) for the CSD search of (a) acid-pyridine (b) acid-acridine and acridine derivatives, (c) carboxylate-pyridinium, (d) carboxylate-acridinium.

#### S4. Infrared Spectroscopy (IR-Spectra):

The samples BZA, BZA-ACR, BZA-4-IPy 1.BZA were prepared as mentioned in the synthesis and crystallization section. Grind mixture of these recrystallized samples were used to collect IR-spectra using Bruker ATR instrument within a range of 500 to 4000  $\text{cm}^{-1}$  with a resolution of 4  $\text{cm}^{-1}$ . The carbonyl stretching frequency lowered from BZA to BZA-4-IPy to 1.BZA lowest frequency was observed for BZA-ACR. This observation confirmed the weakening of the C=O bond. Carbonyl bond order could decrease when there was a possibility of proton transfer. The carbonyl bond length of the refined benzoic acid structures were also supported the IR observation. The carbonyl bond length and IR frequency for carbonyl stretching are tabulated below. To further confirm the observations from IR-spectra and carbonyl bond length of the refined structures, computational calculations were also performed; for details see ESI-S5.

| compound             | C=O (D2) (Å) | C-O (D1) (Å) | $\Delta D = D2 - D1$<br>(Å) | C=O stretching frequency<br>( $\text{cm}^{-1}$ ) |
|----------------------|--------------|--------------|-----------------------------|--------------------------------------------------|
| BZA native structure | 1.213(6)     | 1.301(5)     | 0.088                       | 1705                                             |
| BZA-4-IPy            | 1.219(4)     | 1.297(5)     | 0.078                       | 1695                                             |
| 1.BZA                | 1.224(3)     | 1.273(3)     | 0.049                       | 1687                                             |

|         |          |          |      |      |
|---------|----------|----------|------|------|
| BZA-ACR | 1.239(2) | 1.269(2) | 0.03 | 1657 |
|---------|----------|----------|------|------|

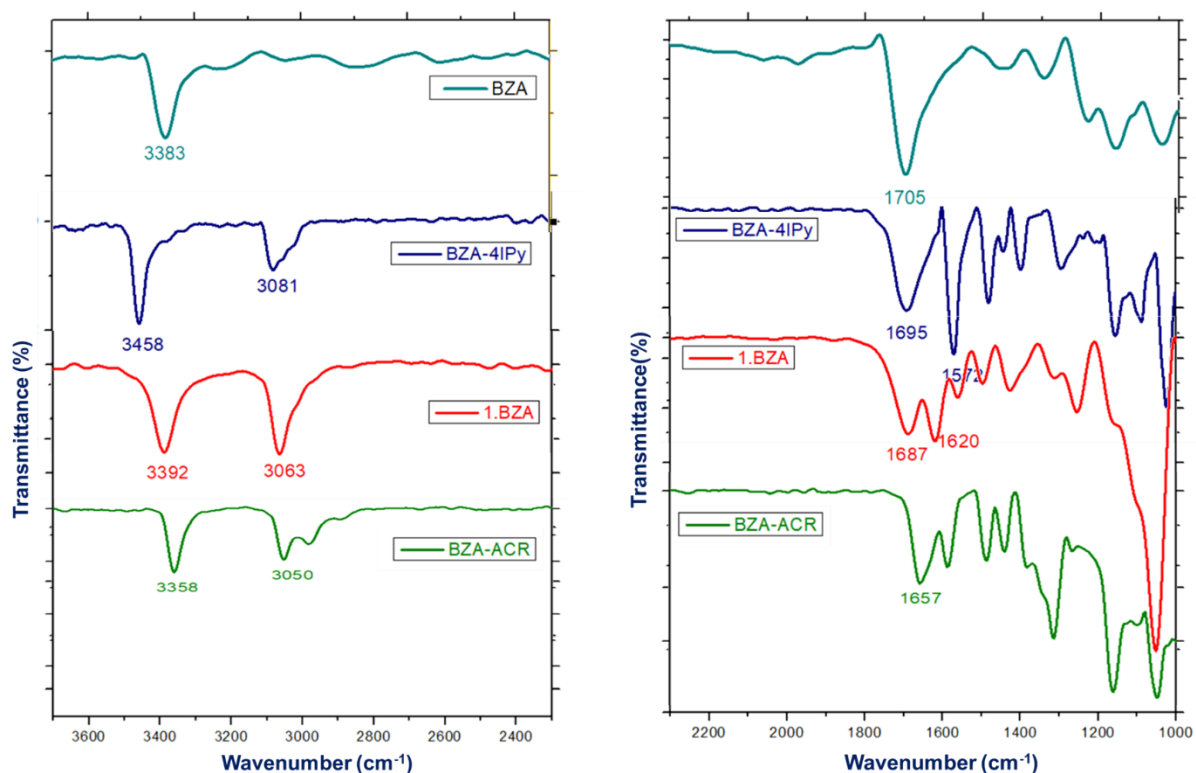

Figure3. IR spectra of (a) benzilic acid, (b) BZA-4-IPy, (c) 1.BZA, (d) BZA-ACR.

## S5. Computational studies:

### A. $\Delta pK_a$ calculation

$\Delta pK_a$  calculation is generally used as a guideline to recognize cocrystals, continuum, and salt formation for multicomponent crystals comprising acids and bases.<sup>23</sup>  $\Delta pK_a$  calculation for the cofomers was done using ChemAxon Chemicalize software.  $pK_a$  for the conjugate acid of the base and  $pK_a$  for the acid was tabulated below, and  $\Delta pK_a$  is also calculated. Almost 0.86  $pK_a$  difference between the two cofomers observed with benzilic acid. ACR has a higher  $pK_a$  value compared to 1, which defines the higher tendency of ACR for proton transfer.

| Compound              | $Pk_a$ | $\Delta pK_a$ |
|-----------------------|--------|---------------|
| BZA                   | 3.93   | -----         |
| Conjugate acid of ACR | 6.15   | 2.22          |
| Conjugate acid of 1   | 5.29   | 1.36          |

## B. ESP calculation of ACR and 1:

ESP calculations for acridine and (*E*)-4-(3,5-dichlorostyryl) pyridine were carried out using Gaussian 09. The DFT-based method was used to calculate the ESP charges using the basis set B3LYP 6311G\* with the keyword pop=chelpg. After completion of the calculation, the ESP maps were generated by using molecular electron density of 0.0004 electron/Å. The respective colour codes mark the locations of positive charges as green and negative charges as red surfaces. The charge on the N atom of ACR is -0.855368, which is much higher than the charge concentrated on the N atom of 1. Depending on the charges of the respective molecule that concentrates on the N-atoms, it is clear that ACR possesses a higher negative charge than 1 (-0.815475), which hinted at the salt formation tendency of ACR over 1.

| Molecule | Template Energy (Hartree) | Mullikan Charges | ESP charges    |
|----------|---------------------------|------------------|----------------|
| ACR      | -551.794334               | 1 C -0.076703    | 1 C -0.098915  |
|          |                           | 2 C -0.094884    | 2 C -0.227449  |
|          |                           | 3 C 0.676125     | 3 C 0.076637   |
|          |                           | 4 C -0.833328    | 4 C 0.611176   |
|          |                           | 5 C -0.479563    | 5 C -0.301625  |
|          |                           | 6 C -0.267230    | 6 C -0.069125  |
|          |                           | 7 C 0.099651     | 7 C -0.298013  |
|          |                           | 8 C -0.833328    | 8 C 0.611176   |
|          |                           | 9 C 0.676125     | 9 C 0.076637   |
|          |                           | 10 C -0.094884   | 10 C -0.227449 |
|          |                           | 11 H 0.251491    | 11 H 0.129323  |
|          |                           | 12 C -0.076703   | 12 C -0.098915 |
|          |                           | 13 C -0.267230   | 13 C -0.069125 |
|          |                           | 14 C -0.479563   | 14 C -0.301625 |
|          |                           | 15 H 0.269079    | 15 H 0.196708  |
|          |                           | 16 H 0.235811    | 16 H 0.100817  |
|          |                           | 17 H 0.251491    | 17 H 0.129323  |
|          |                           | 18 H 0.265988    | 18 H 0.149879  |
|          |                           | 19 H 0.240104    | 19 H 0.107618  |
|          |                           | 20 H 0.235811    | 20 H 0.100817  |

|   |              |                |                 |
|---|--------------|----------------|-----------------|
|   |              | 21 H 0.240104  | 21 H 0.107618   |
|   |              | 22 H 0.265988  | 22 H 0.149879   |
|   |              | 23 N -0.204354 | 23 N -0.855368  |
| 1 | -1475.760554 | 1 C 0.316535   | 1 C 0.148005    |
|   |              | 2 C -0.395775  | 2 C -0.157723   |
|   |              | 3 C -0.530282  | 3 C 0.137908    |
|   |              | 4 C -0.232511  | 4 C -0.218177   |
|   |              | 5 C 0.605297   | 5 C 0.181305    |
|   |              | 6 C -1.107789  | 6 C -0.151045   |
|   |              | 7 H 0.182644   | 7 H 0.114544    |
|   |              | 8 H 0.196297   | 8 H 0.135171    |
|   |              | 9 H 0.212541   | 9 H 0.134580    |
|   |              | 10 C -0.362676 | 10 C -0.087524  |
|   |              | 11 C -0.474944 | 11 C -0.411009  |
|   |              | 12 H 0.164566  | 12 H 0.135004   |
|   |              | 13 H 0.161636  | 13 H 0.213164   |
|   |              | 14 C -0.051768 | 14 C 0.590035   |
|   |              | 15 C 0.001760  | 15 C -0.523864  |
|   |              | 16 C 0.768703  | 16 C -0.546249  |
|   |              | 17 C -0.430017 | 17 C 0.582903   |
|   |              | 18 H 0.167063  | 18 H 0.146221   |
|   |              | 19 C -0.412481 | 19 C 0.601032   |
|   |              | 20 H 0.179689  | 20 H 0.150580   |
|   |              | 21 N -0.200214 | 21 N -0.815475  |
|   |              | 22 H 0.186093  | 22 H -0.020292  |
|   |              | 23 H 0.186822  | 23 H -0.023860  |
|   |              | 24 Cl 0.428875 | 24 Cl -0.154784 |
|   |              | 25 Cl 0.439936 | 25 Cl -0.160450 |



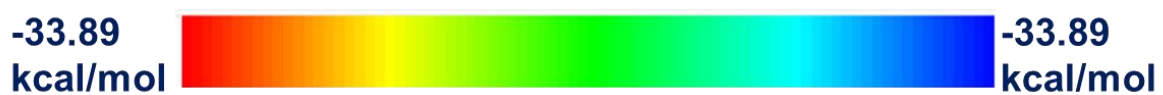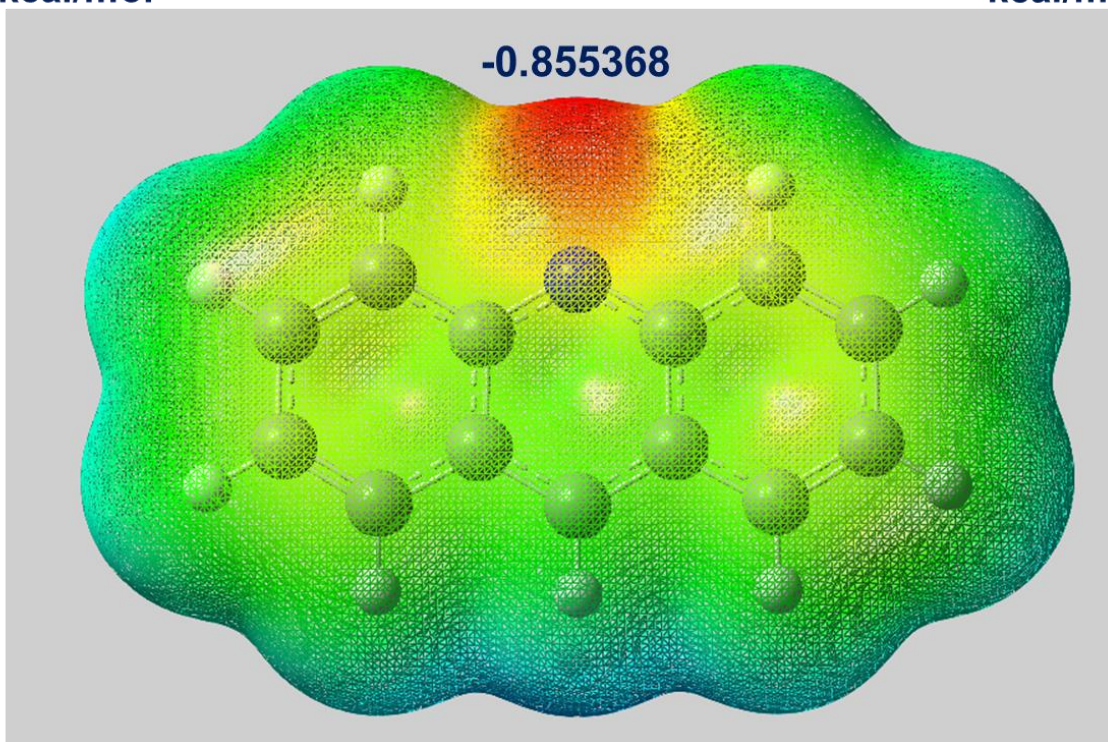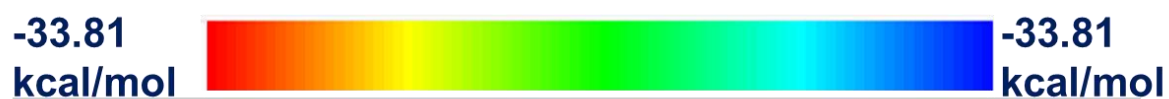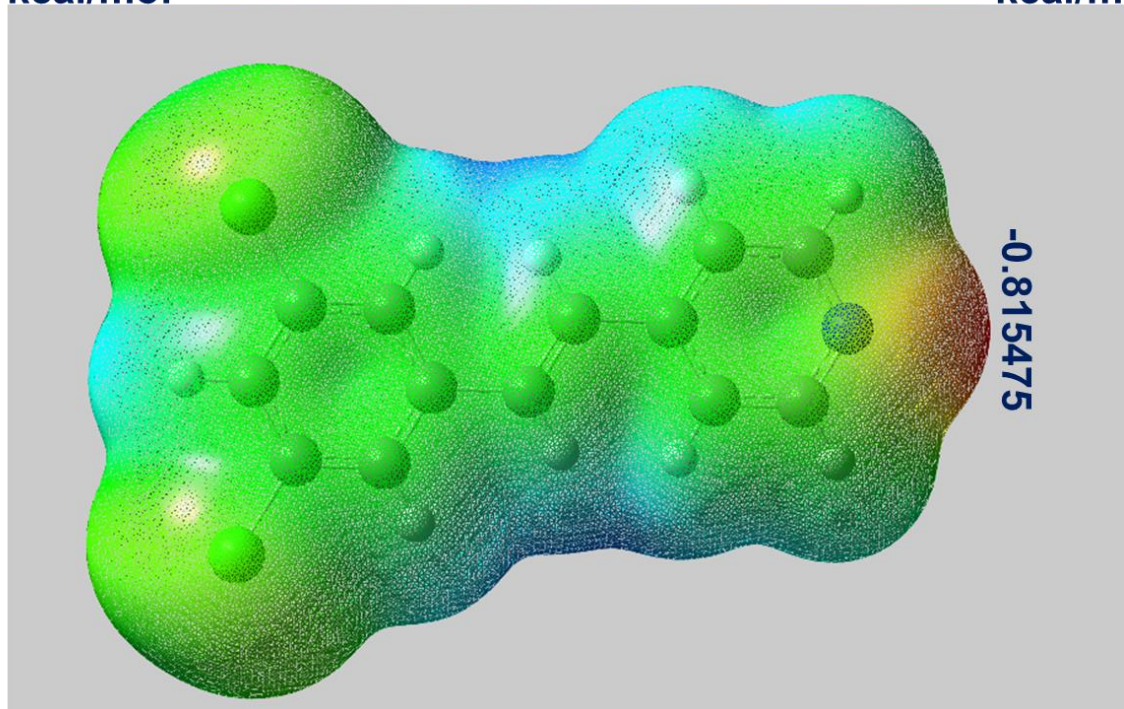

Figure 4: Electrostatic surface potential of (a) ACR and (b) 1.

**C. Slant Plane Calculation:** The slant plane of three systems, BZA-ACR, BZA-4IPy, and 1.BZA, were calculated by removing labile hydrogen from the structure using WinGX software<sup>24</sup>. Plane containing carboxylic O and pyridine N was considered for generating the plane. The gradual shifting of residual density toward N from 4-IPy to 1 to ACR indicated the more salt character of the BZA-ACR system.

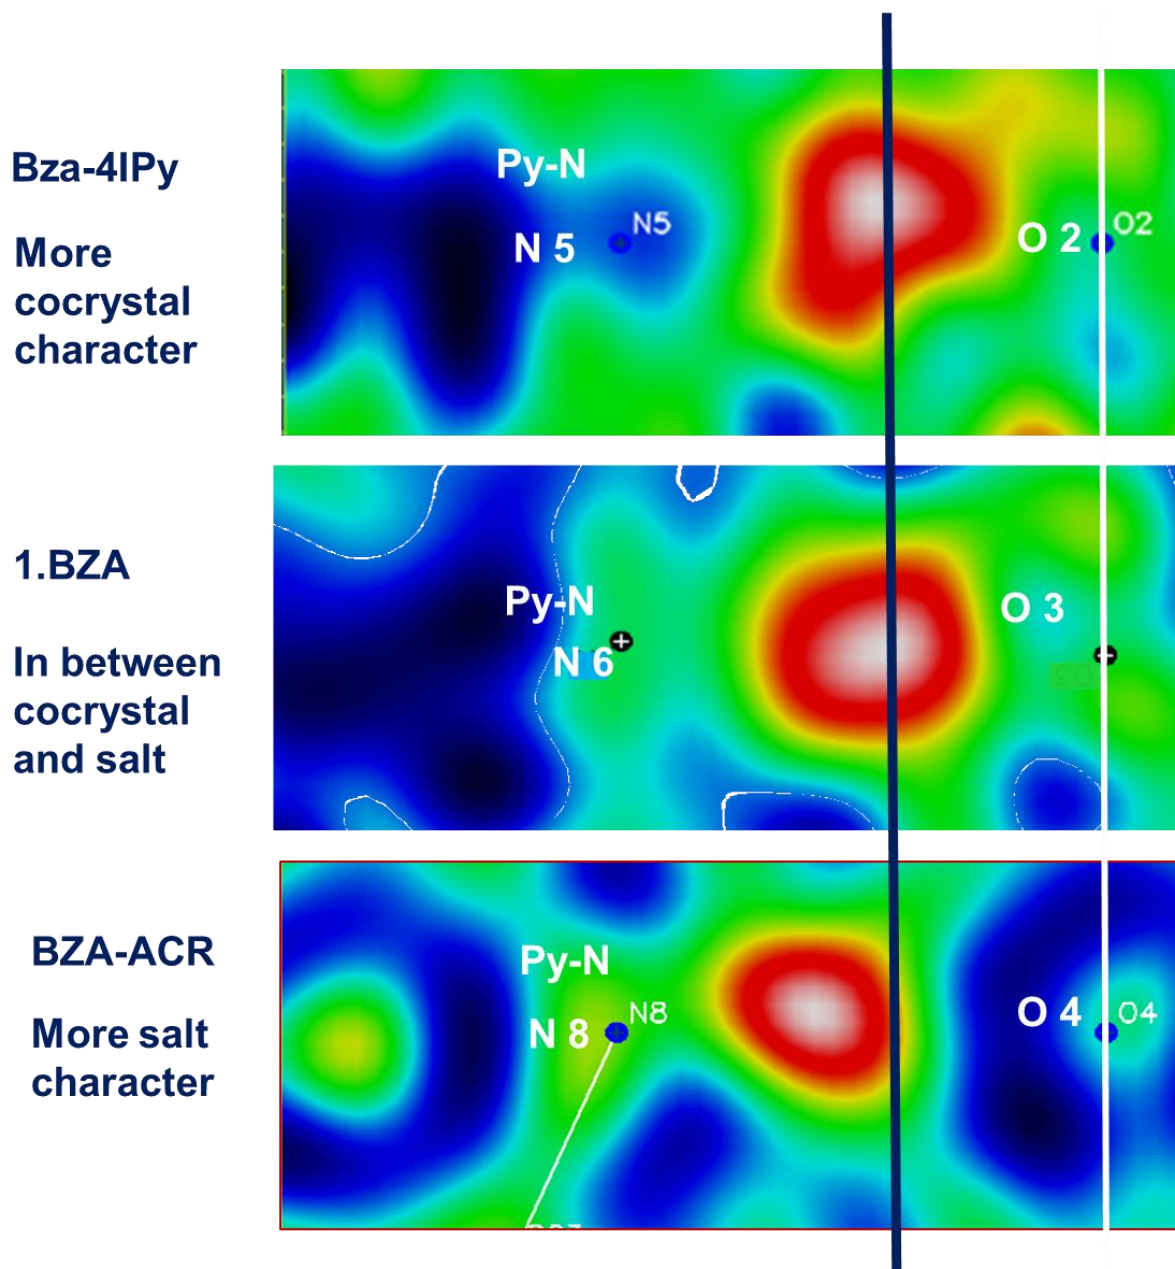

#### D. Energy Framework calculation

Energy framework calculation was performed using Crystal Explorer 21.5<sup>25</sup> using a B3LYP 6311G(d,p) basis set. The weakest interaction for 1 was observed along the (011) plane. The weakest interaction for 1 and 2 is marked with blue and red patches.



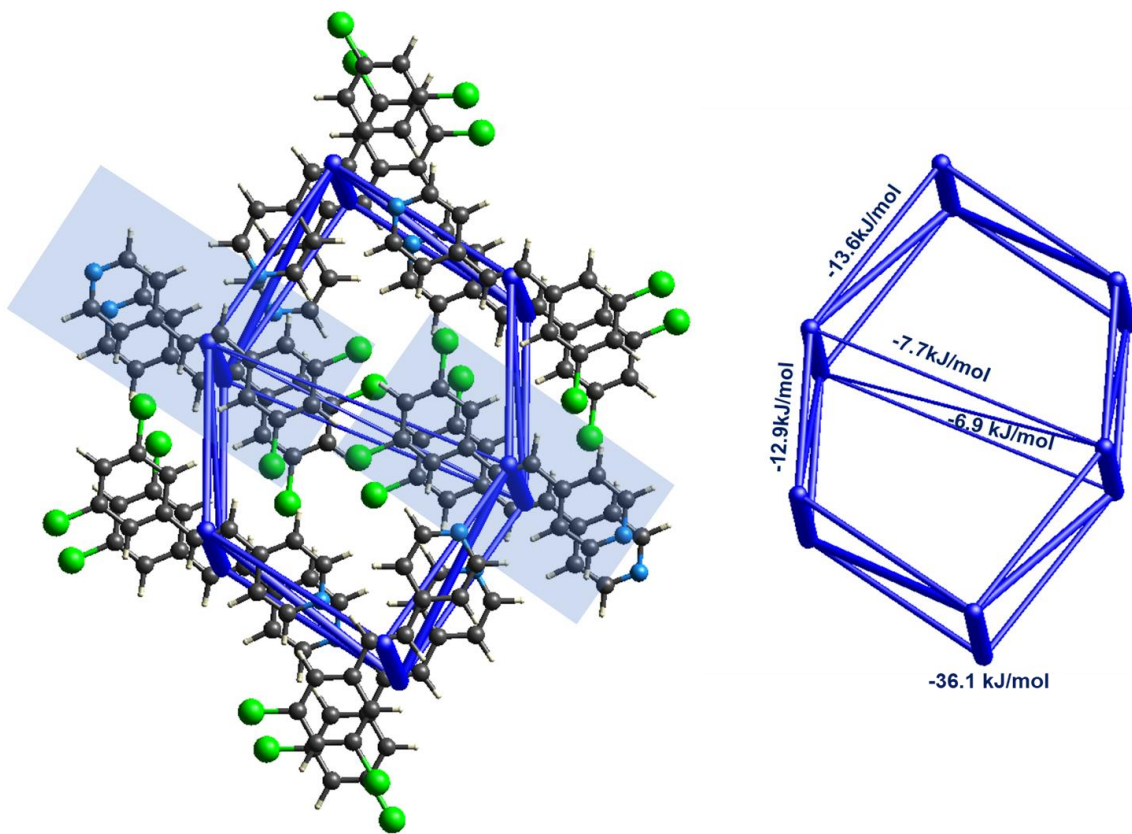

(a)

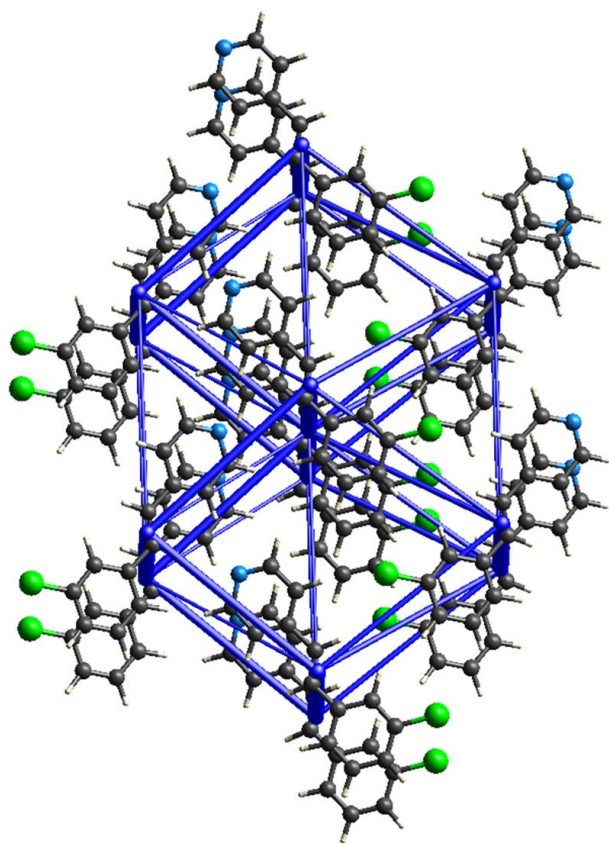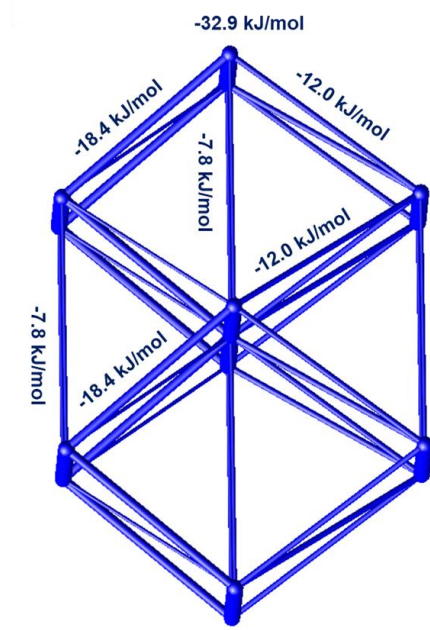

(b)

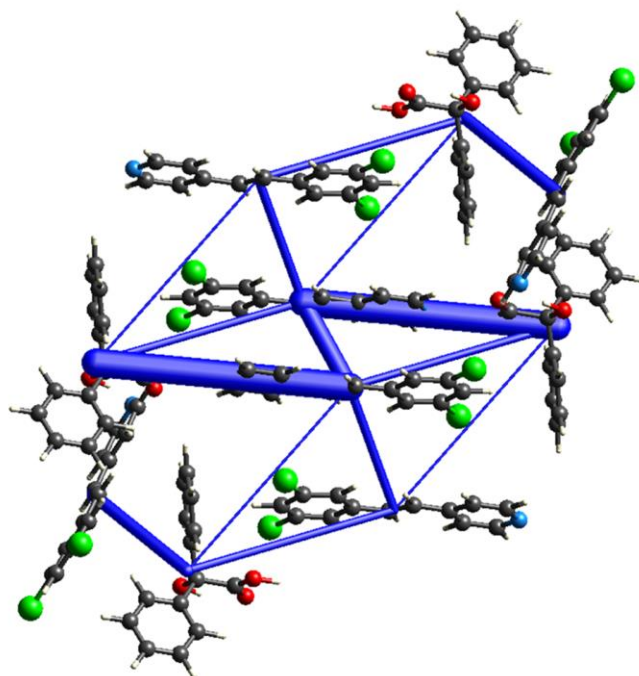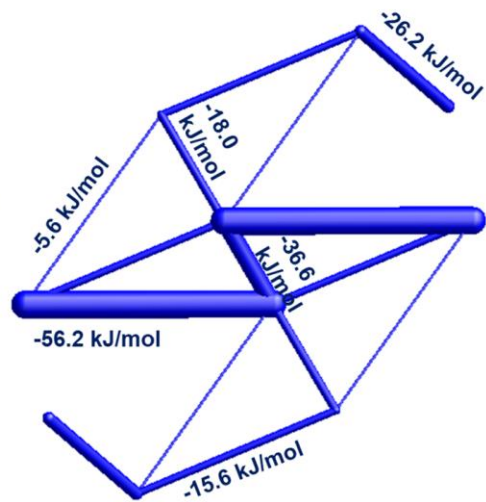

(c)

Figure 5: Energy framework analysis for (a) 1, (b) 2, (c) 1.BZA

## S6. Crystallization Details

(a) *Crystallization procedure of BZA.ACR*: Three coformers, benzoic acid (~57mg), 4,4'-bipyridine (~39 mg), and acridine (~45mg) were taken in a 1:1:1 ratio in a mortar and ground with 5-6 drops of DCM three times. The DCM ground mixture was then dissolved in ethanol and kept for evaporation. After 4 days, yellow-colored block-shaped crystals were obtained and used for single crystal analysis.

(b) *Crystallization procedure of BZA.4IPy*: Benzoic acid (~57mg) and 4-iodopyridine (~51.2mg) were taken in a 1:1 ratio and ground with ethanol (5-6 drops) three times. The ethanol ground mixture was dissolved in nitromethane and kept for slow evaporation. Colorless block-shaped crystals were obtained after 4 days.

(c) *Crystallization procedure of 1.BZA*: (E)-4-(3,5-dichlorostyryl) pyridine (~62.5mg) and benzoic acid (~57 mg) were taken in 1:1 ratio and ground with DCM 3-4 times. The DCM ground powder mixture was dissolved in DCM and kept for slow evaporation. Yellow block-shaped crystals were obtained after 2 days. These crystals were used for further characterization and photo irradiation.

(d) *Crystallization procedure of 2.BZA*: (E)-4-(3-chlorostyryl) pyridine (~54mg) and benzoic acid (~57 mg) was taken in 1:1 ratio and ground with DCM 3-4 times. The DCM ground mixture was dissolved in DCM and kept for slow evaporation. Yellow block-shaped crystals were obtained after 2 days and used for further characterization and photo irradiation.

(e) *Crystallization procedure of 3.BZA*: (E)-4-(3-bromostyryl) pyridine (~65mg) and benzoic acid (~57 mg) was taken in 1:1 ratio and ground with DCM 3-4 times. The ground mixture was dissolved in DCM and kept for slow evaporation. Yellow block-shaped crystals were obtained after 2 days and used for further characterization and photo irradiation.

## S7. Single Crystal X-ray diffraction:

All the single crystal data were collected using Rigaku Oxford XtaLAB diffractometer using Cu-K $\alpha$  ( $\lambda = 1.54184 \text{ \AA}$ ) radiation, and the collected data were processed with CrysAlisPRO 2015 software. Some data reductions were performed using CrysAlisPro 2021. The structure solution was carried out with the SHELXT program, and data refinement was done using SHELXL programs embedded in OLEX<sup>2</sup>-1.51. All non-hydrogen atoms were refined anisotropically by the full-least-squares method, whereas all the hydrogen atoms were refined isotropically. The H atoms were fixed on a riding model, and acidic H atoms were located via

Fourier maps. Mercury version 4.2.0<sup>26</sup> was used for crystal structure analysis and for generating packing diagrams. The Packing diagram of BZA.ACR, BZA-4IPy, 1 and 1. BZA was presented in the manuscript, packing diagram of 2, 3, 2.BZA and 3.BZA is shown below.

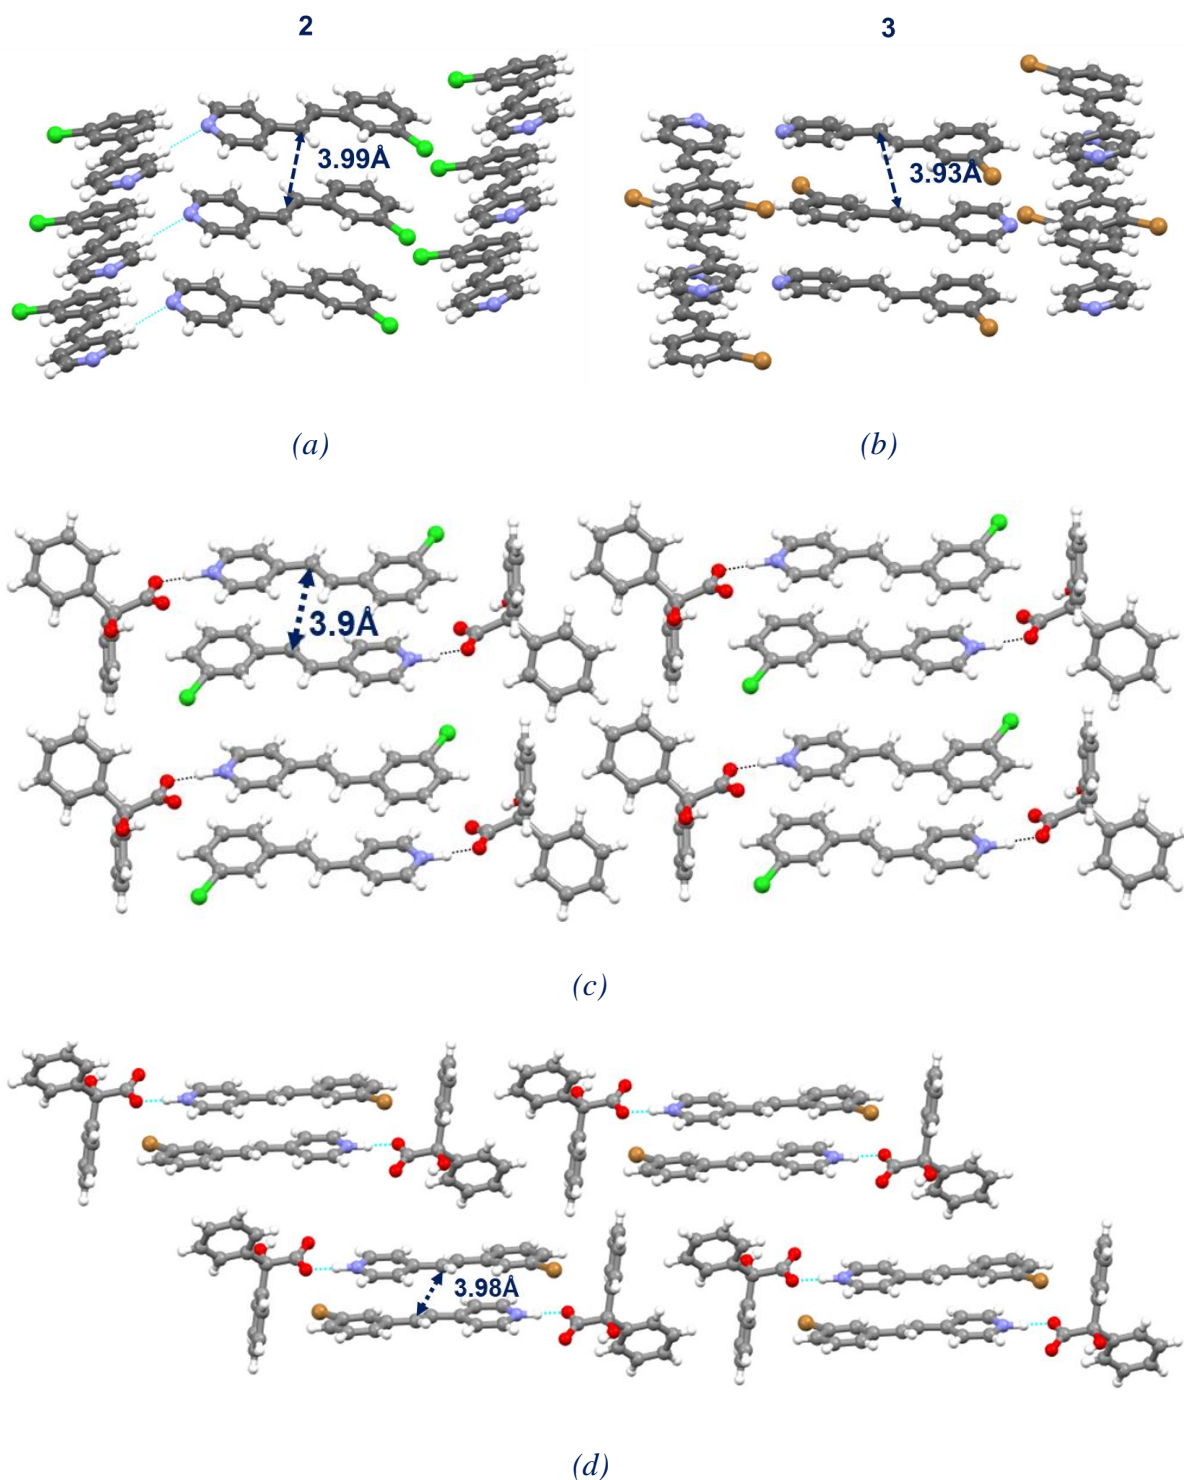

Figure 6: Packing diagram of (a) 1, (b) 2, (c) 2.BZA (d) 3.BZA.

### S8. (a) Crystallographic table:

|                                              |                                                  |                                                                     |                                                        |                                                        |
|----------------------------------------------|--------------------------------------------------|---------------------------------------------------------------------|--------------------------------------------------------|--------------------------------------------------------|
| <i>compound</i>                              | BZA.ACR                                          | BZA-4IPy                                                            | 1                                                      | 2                                                      |
| <i>Empirical formula</i>                     | C <sub>27</sub> H <sub>21</sub> N O <sub>3</sub> | C <sub>19</sub> H <sub>16</sub> I N O <sub>3</sub>                  | C <sub>13</sub> H <sub>9</sub> Cl <sub>2</sub> N       | C <sub>13</sub> H <sub>10</sub> Cl<br>N                |
| <i>CCDC NO.</i>                              | 2289890                                          | 2289891                                                             | 2290412                                                | 2291018                                                |
| <i>Formula Weight</i>                        | 407.45                                           | 433.23                                                              | 250.11                                                 | 215.67                                                 |
| <i>Crystal System</i>                        | Triclinic                                        | Triclinic                                                           | Monoclinic                                             | Monoclinic                                             |
| <i>Space Group</i>                           | $P\bar{1}$                                       | $P\bar{1}$                                                          | $P2_1/c$                                               | $Pn$                                                   |
| <i>a</i> (Å)                                 | 6.7453(2)                                        | 6.4536(1)                                                           | 3.8714(1)                                              | 3.9947(2)                                              |
| <i>b</i> (Å)                                 | 16.8984(3)                                       | 8.3751(2)                                                           | 11.4217(3)                                             | 13.9322(5)                                             |
| <i>c</i> (Å)                                 | 18.0463(4)                                       | 16.1607(5)                                                          | 26.3704(6)                                             | 9.8346(4)                                              |
| <i>α</i> (°)                                 | 93.589(2)                                        | 83.149(2)                                                           | 90                                                     | 90                                                     |
| <i>β</i> (°)                                 | 94.776(2)                                        | 86.845(2)                                                           | 89.998(2)                                              | 100.133(4)                                             |
| <i>γ</i> (°)                                 | 99.891(2)                                        | 83.349(2)                                                           | 90                                                     | 90                                                     |
| <i>V</i> (Å <sup>3</sup> )                   | 2013.19(8)                                       | 860.65(4)                                                           | 1166.05(5)                                             | 538.81(4)                                              |
| <i>ρ<sub>calc</sub></i> (g/cm <sup>3</sup> ) | 1.344                                            | 1.672                                                               | 1.425                                                  | 1.329                                                  |
| <i>F</i> (000)                               | 856.0                                            | 428.0                                                               | 512.0                                                  | 224.0                                                  |
| <i>μ</i> . (mm <sup>-1</sup> )               | 0.701                                            | 14.757                                                              | 4.743                                                  | 2.817                                                  |
| <i>T</i> (K)                                 | 140                                              | 140                                                                 | 295                                                    | 300                                                    |
| <i>λ</i> (Å)                                 | 1.54184                                          | 1.54184                                                             | 1.54184                                                | 1.54184                                                |
| <i>Total Reflections.</i>                    | 8483                                             | 3605                                                                | 2483                                                   | 1684                                                   |
| <i>Unique Reflection</i>                     | 6467                                             | 3506                                                                | 2141                                                   | 1576                                                   |
| <i>Completeness (%)</i>                      | 99.7                                             | 99.4                                                                | 99.7                                                   | 99.9                                                   |
| <i>R<sub>int</sub></i>                       | 5.27                                             | 4.37                                                                | 5.84                                                   | 3.01                                                   |
| <i>R<sub>1</sub></i> (F <sup>2</sup> )       | 5.11                                             | 3.99                                                                | 4.53                                                   | 3.57                                                   |
| <i>wR<sub>2</sub></i> (F <sup>2</sup> )      | 14.77                                            | 11.21                                                               | 13.94                                                  | 10.33                                                  |
| <i>GoF</i>                                   | 1.066                                            | 1.074                                                               | 1.062                                                  | 1.053                                                  |
| <i>Θ<sub>max</sub></i>                       | 79.662                                           | 79.796                                                              | 79.367                                                 | 79.682                                                 |
|                                              |                                                  |                                                                     |                                                        |                                                        |
| <i>compound</i>                              | 3                                                | 1.BZA                                                               | 2.BZA                                                  | 3.BZA                                                  |
| <i>Empirical formula</i>                     | C <sub>13</sub> H <sub>10</sub> Br N             | C <sub>27</sub> H <sub>21</sub> Cl <sub>2</sub> N<br>O <sub>3</sub> | C <sub>27</sub> H <sub>22</sub> Cl N<br>O <sub>3</sub> | C <sub>27</sub> H <sub>22</sub> Br<br>N O <sub>3</sub> |
| <i>CCDC NO.</i>                              | 2291142                                          | 2289881                                                             | 2289888                                                | 2289889                                                |



|                                          |                 |             |             |             |
|------------------------------------------|-----------------|-------------|-------------|-------------|
| <i>Formula Weight</i>                    | 260.12          | 478.35      | 443.91      | 488.36      |
| <i>Crystal System</i>                    | Orthorhombic    | Monoclinic  | Triclinic   | Triclinic   |
| <i>Space Group</i>                       | $P 2_1 2_1 2_1$ | $P2_1/c$    | $P\bar{1}$  | $P\bar{1}$  |
| <i>a</i> (Å)                             | 7.3605(4)       | 8.9426(3)   | 8.5593(2)   | 8.79940(10) |
| <i>b</i> (Å)                             | 12.2746(4)      | 18.2781(4)  | 10.3705(2)  | 10.2996(1)  |
| <i>c</i> (Å)                             | 12.3726(3)      | 14.4279(4)  | 13.0745(2)  | 13.0538(2)  |
| $\alpha$ (°)                             | 90              | 90          | 88.6790(10) | 89.3630(10) |
| $\beta$ (°)                              | 90              | 90.619(2)   | 74.542(2)   | 74.7030(10) |
| $\gamma$ (°)                             | 90              | 90          | 82.8740(10) | 82.8310(10) |
| <i>V</i> (Å <sup>3</sup> )               | 1117.83(8)      | 2358.16(12) | 1109.87(4)  | 1131.94(2)  |
| $\rho_{calc}$ (g/cm <sup>3</sup> )       | 1.546           | 1.347       | 1.328       | 1.433       |
| <i>F</i> (000)                           | 520.0           | 992.0       | 464.0       | 500.0       |
| $\mu$ . (mm <sup>-1</sup> )              | 4.705           | 2.715       | 1.760       | 2.708       |
| <i>T</i> (K)                             | 295             | 140         | 140         | 143         |
| $\lambda$ (Å)                            | 1.54184         | 1.54184     | 1.54184     | 1.54184     |
| <i>Total Reflections</i>                 | 2153            | 5016        | 4648        | 4746        |
| <i>Unique Reflections</i>                | 1510            | 3264        | 4256        | 4386        |
| <i>Completeness</i> (%)                  | 99.6            | 100         | 99.7        | 99.6        |
| <i>R</i> <sub>int</sub>                  | 4.45            | 4.58        | 3.37        | 3.02        |
| <i>R</i> <sub>1</sub> (F <sup>2</sup> )  | 5.54            | 5.47        | 3.96        | 4.10        |
| <i>wR</i> <sub>2</sub> (F <sup>2</sup> ) | 18.32           | 16.26       | 10.76       | 11.77       |
| <i>GoF</i>                               | 1.081           | 1.058       | 1.106       | 1.106       |
| $\Theta_{max}$                           | 79.905          | 79.779      | 79.754      | 79.457      |
|                                          |                 |             |             |             |

**(b) H-bonding table:**

| structure        | interaction | D-H     | H...A (Å) | D...A (Å)  | <(DHA) (°) |
|------------------|-------------|---------|-----------|------------|------------|
| <b>BZA-ACR</b>   | N8-H8...O4  | 1.06(3) | 1.53(3)   | 2.5792(18) | 168(2)     |
|                  | N7-H7...O1  | 1.04(3) | 1.54(3)   | 2.5687(18) | 168(2)     |
|                  | O6-H6...O5  | 0.96(3) | 1.87(3)   | 2.5481(18) | 125(2)     |
|                  | O3-H3...O2  | 0.90(3) | 1.97(3)   | 2.589(2)   | 124(2)     |
| <b>BZA-4-IPy</b> | O4-H4...O3  | 0.90(7) | 1.98(7)   | 2.596(4)   | 124(5)     |

|              |               |         |         |            |        |
|--------------|---------------|---------|---------|------------|--------|
|              | O2-H1...N5    | 1.03(8) | 1.55(3) | 2.554(4)   | 165(7) |
| <b>1.BZA</b> | O5-H5...O4    | 0.73(4) | 2.07(4) | 2.577(3)   | 127(4) |
|              | O2-H1...N5    | 1.18(4) | 1.36(4) | 2.534(2)   | 173(4) |
| <b>2.BZA</b> | O4-H4...O3    | 0.87(2) | 1.87(2) | 2.5312(15) | 131(2) |
|              | N5-H2...O2    | 1.10(3) | 1.46(3) | 2.5555(14) | 173(2) |
| <b>3.BZA</b> | O18-H18...O17 | 0.63(4) | 2.04(4) | 2.539(3)   | 136(4) |
|              | N1-H1...O16   | 1.03(6) | 1.54(6) | 2.553(2)   | 170(5) |

## S9. Characterization of the crystallized sample

### A. Powder X-ray Diffraction (PXRD) analysis:

PXRD for the native compound and cocrystals were collected using ground recrystallized samples prepared as discussed before. PXRD for all the cocrystals were collected using Rigaku Ultima IV in a  $2\theta$  range of  $5\text{-}35^\circ$  with a scan speed of  $2^\circ/\text{min}$  using a step size of 0.01. All the simulated PXRD patterns are generated using Mercury 4.2.0<sup>26</sup> software, and the stacked PXRD plots were prepared using X'pert HighScore Plus software.

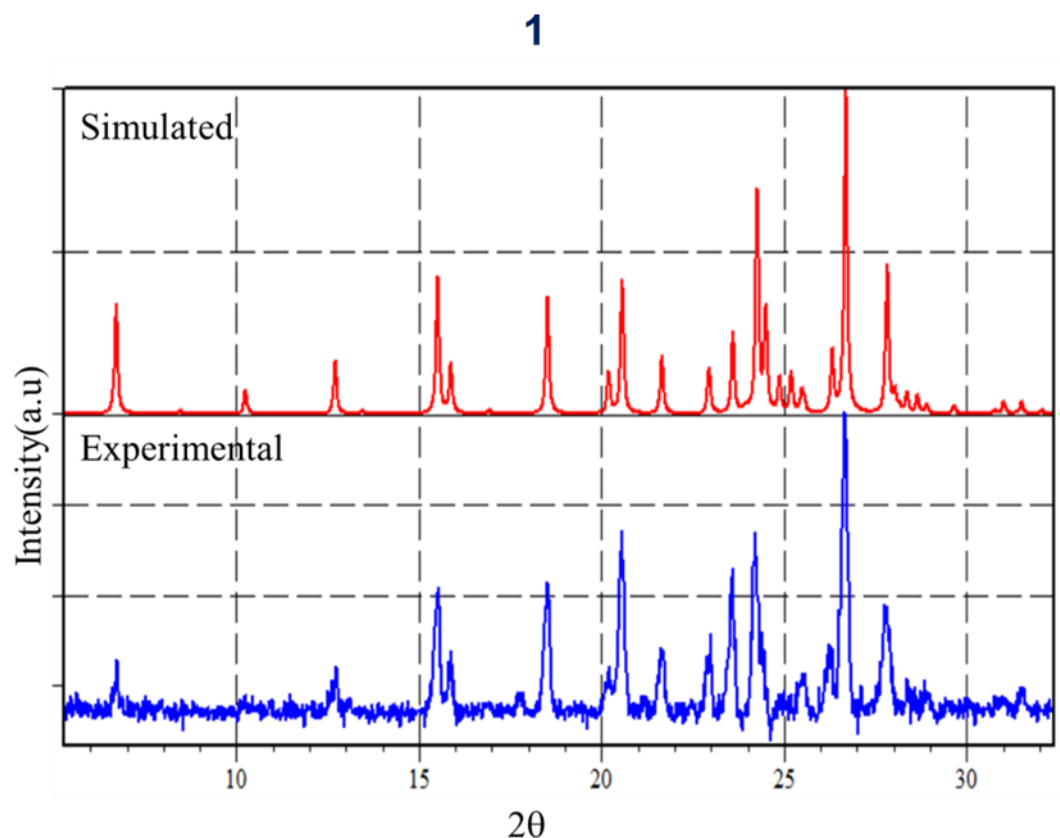

2

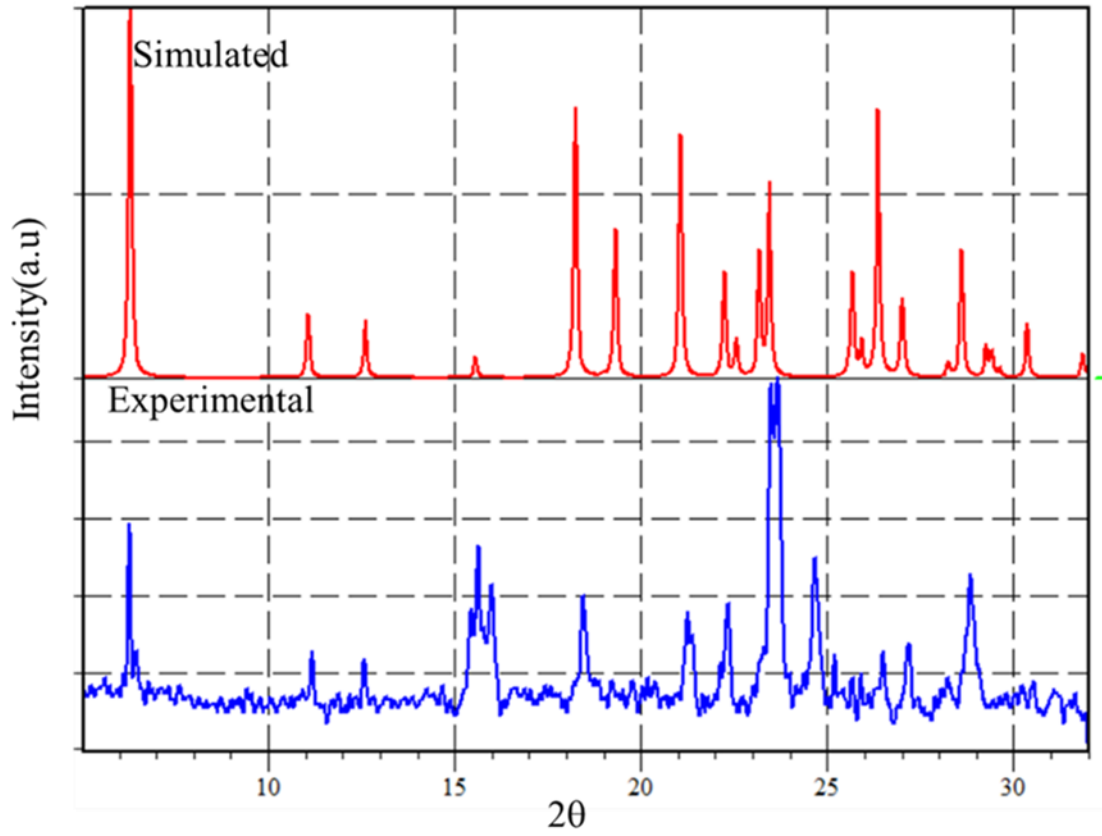

3

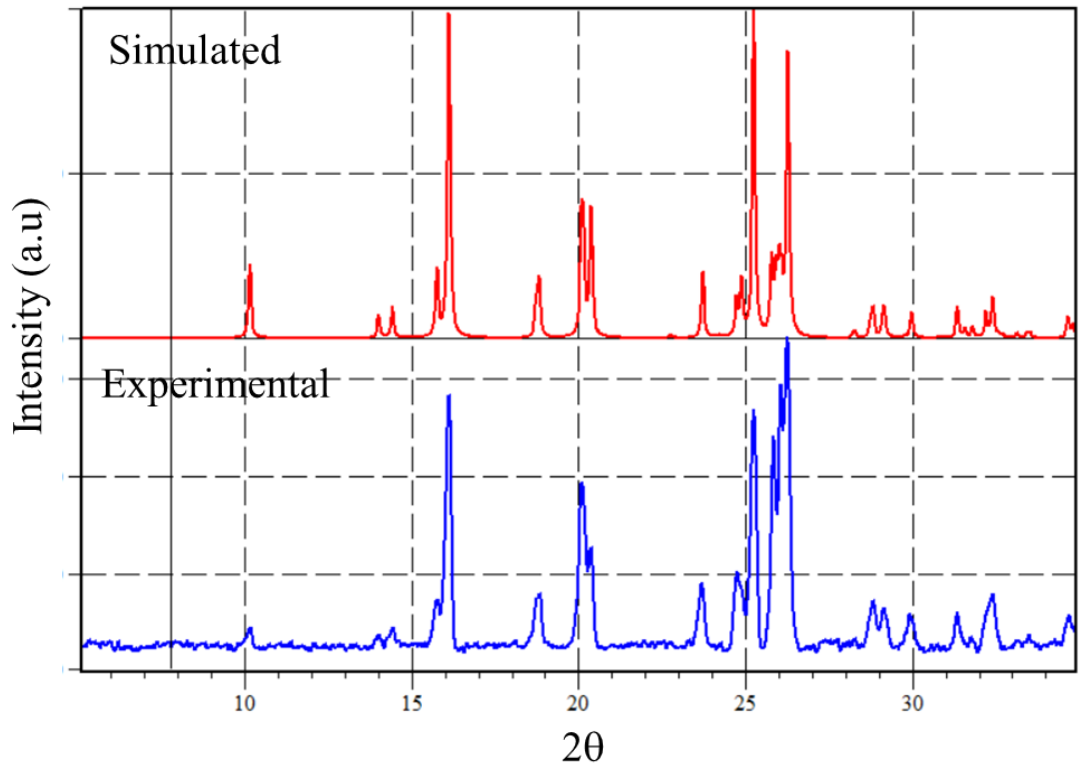



### 1.BZA

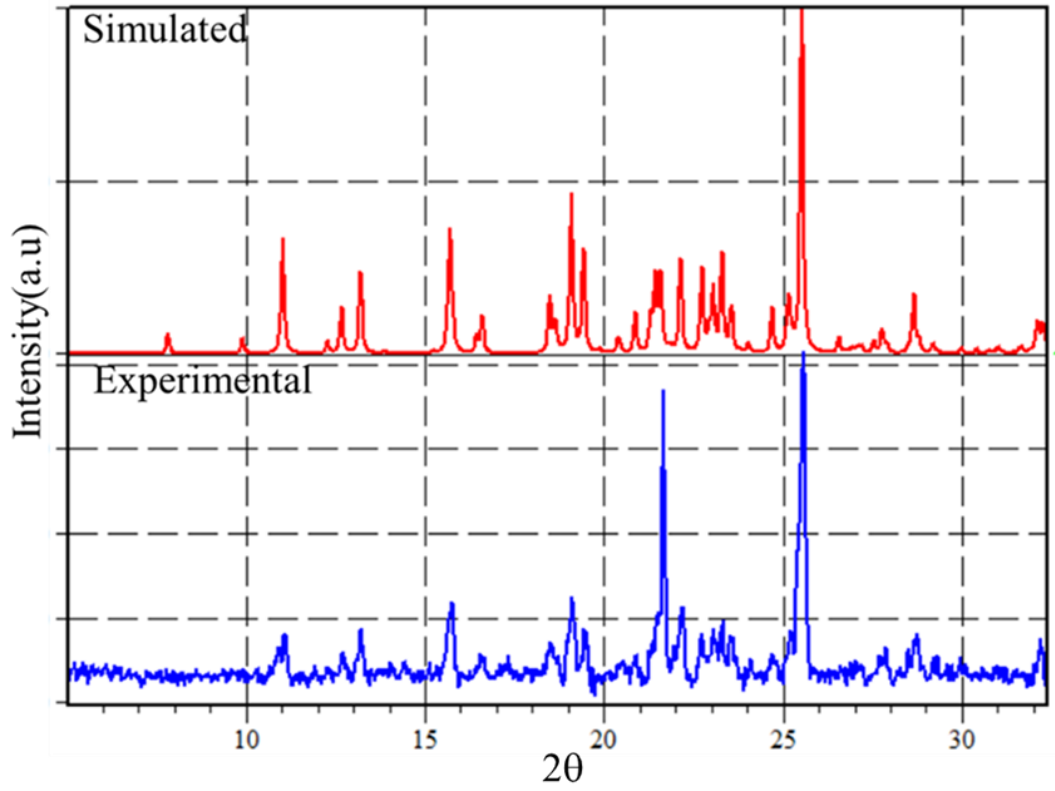

### 2.BZA

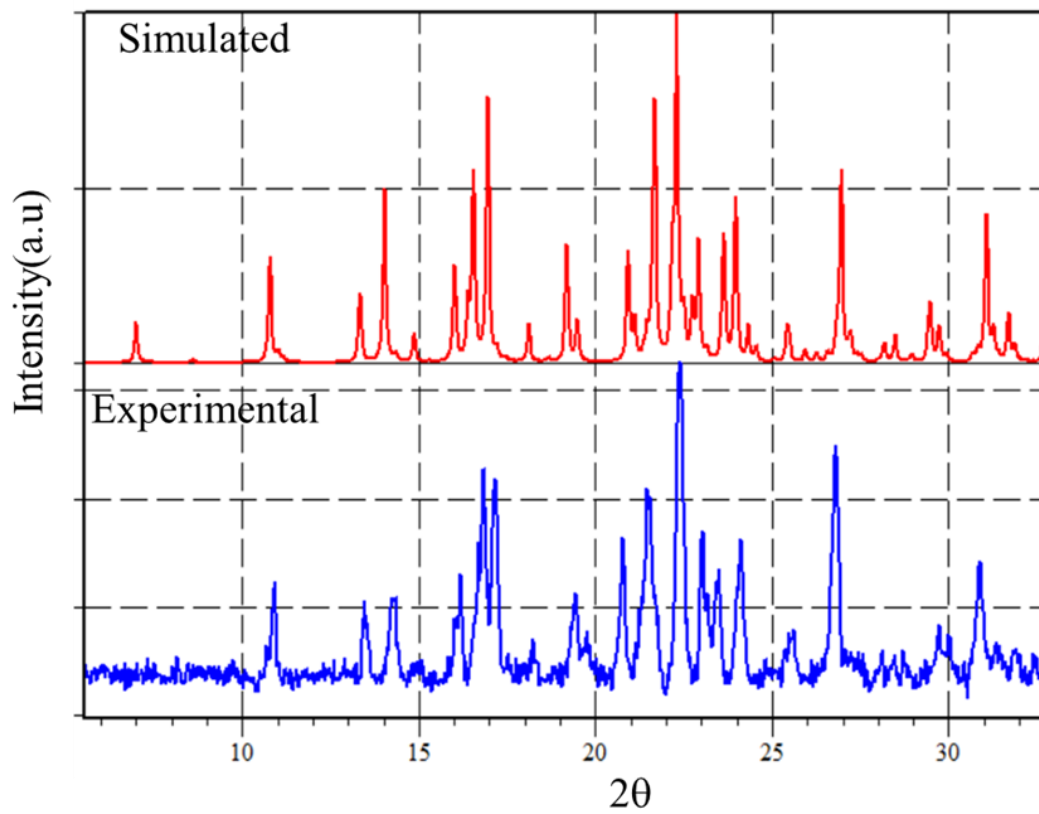

### 3.BZA

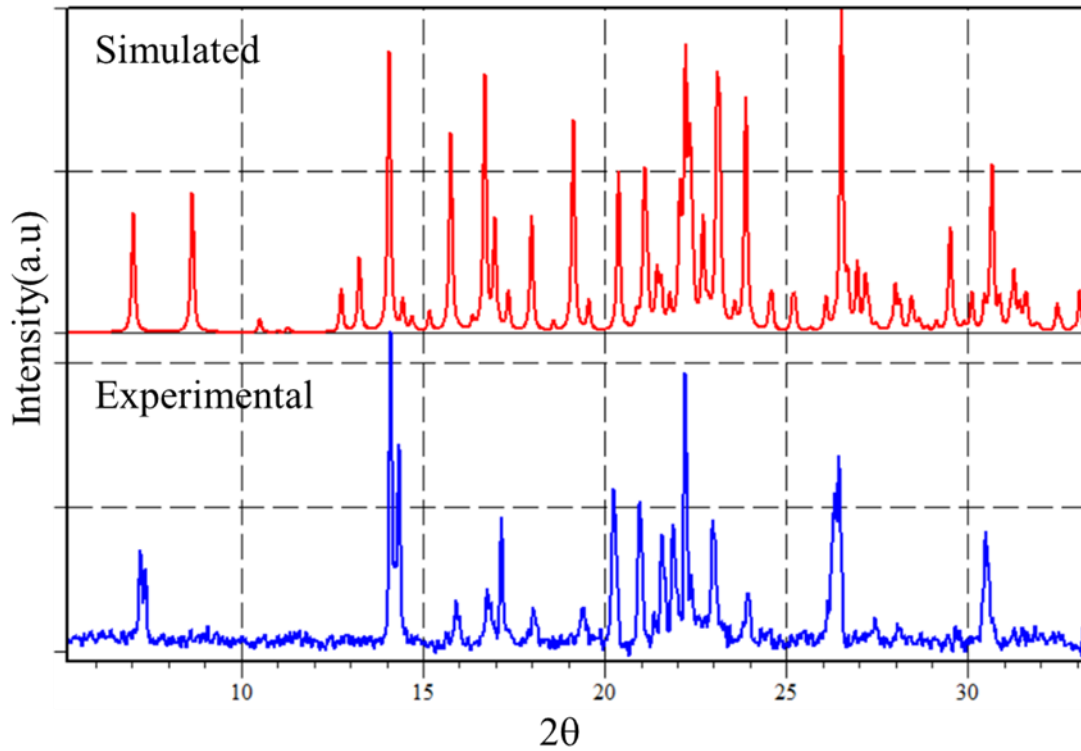

#### B. Differential Thermal Analysis (DSC):

Samples for DSC were prepared by grinding the recrystallized samples. ~3 mg of samples for both the native and cocrystal system were taken in Al-pans and measured the DSC using Shimadzu DSC-60 instrument within a temperature range of RT to 250° C with a scan rate of 5°C/min.

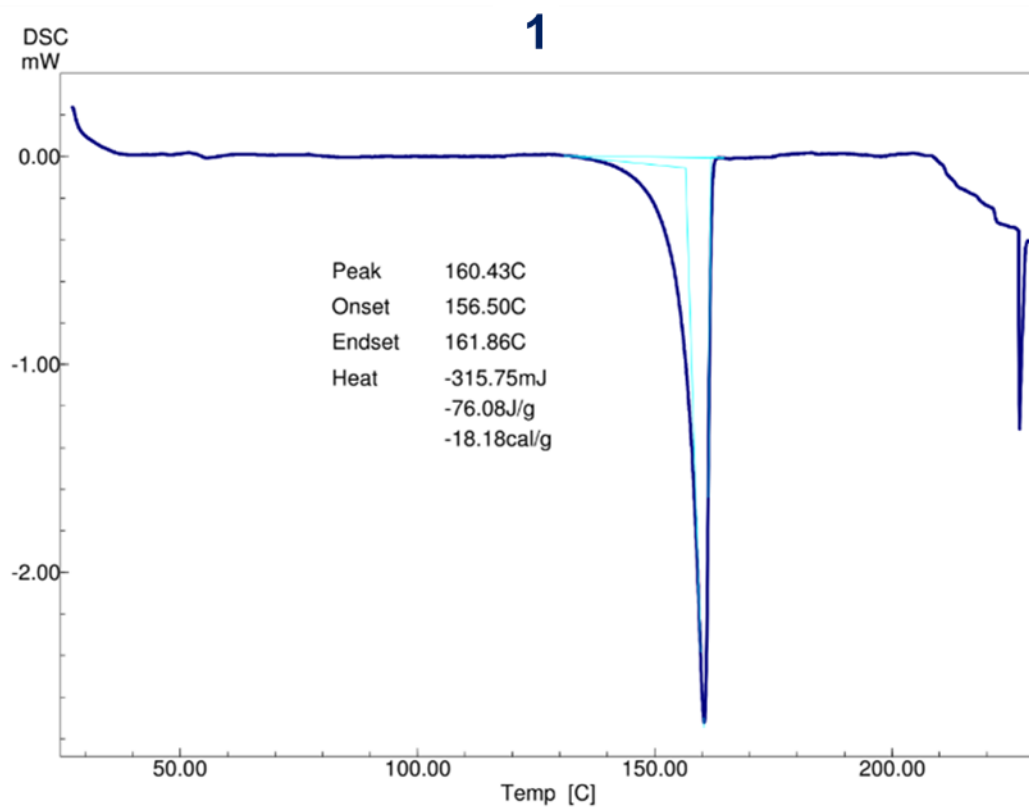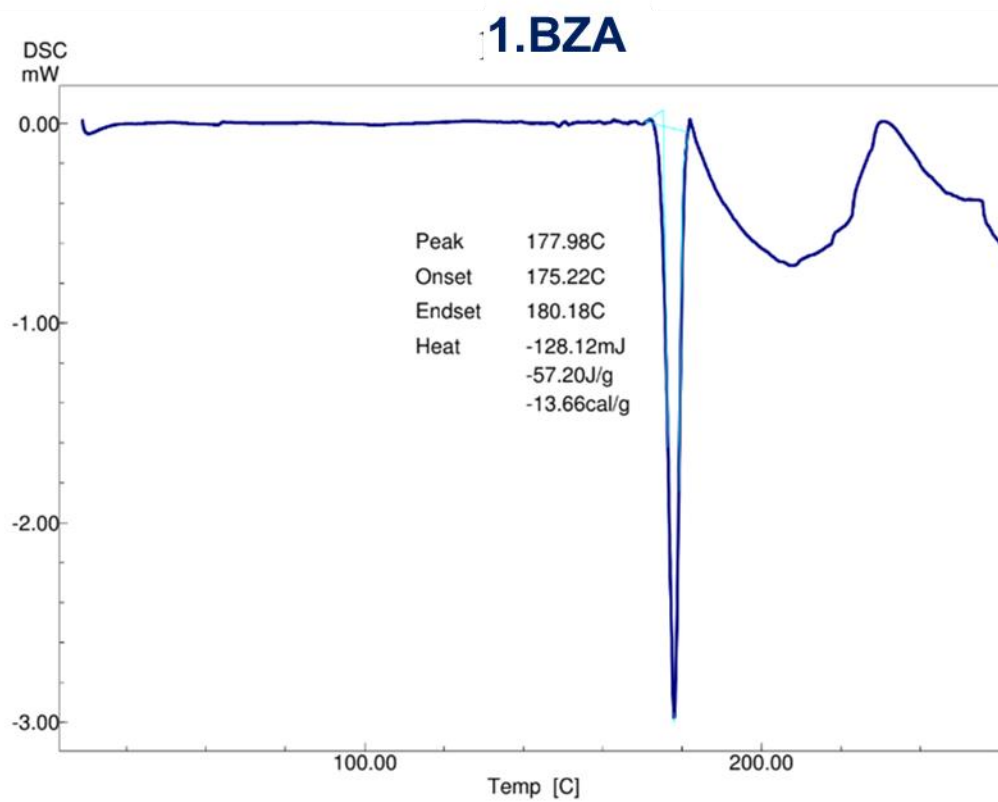

Figure 7: DSC data of 1(top) and 1.BZA (bottom).

**S10. Photoirradiation of the compounds and images of irradiated crystals:**

Phase pure single crystals were taken in Pyrex glass slides and irradiated using a 450-watt medium-pressure mercury lamp for 12 hours. Pictures of the crystals were collected using the OLYMPUS BX53M microscope before and after irradiation. For 1 and 1.BZA images of the crystals before and after were shown in the manuscript, and for 2,3, 2.BZA and 3.BZA, the pictures of crystals before and after irradiation are shown below.

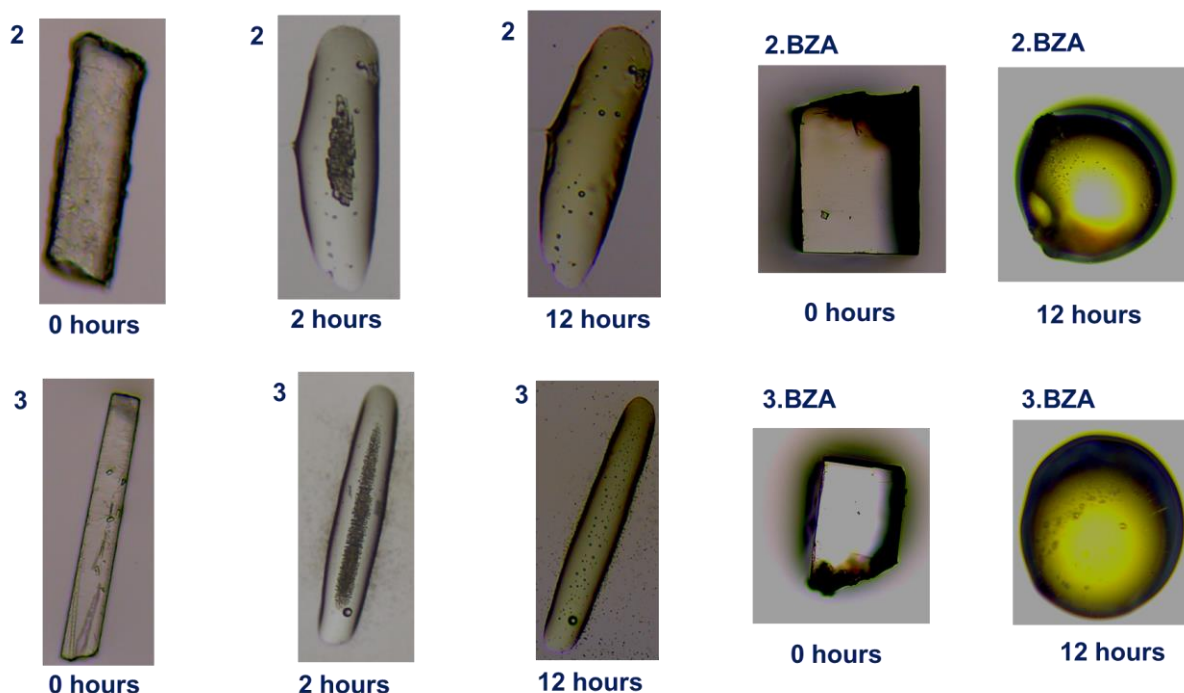

Figure 8. Images of UV-irradiated crystals of 2, 2.BZA; 3 and 3.BZA

## S11. $^1\text{H}$ NMR characterization of photodimerized products:

### A. $^1\text{H}$ NMR characterization of 1 after dimerization:

$^1\text{H}$  NMR for the native compound 1 before and after UV-radiation was collected using Bruker (400 MHz) instrument.  $\sim 7$  mg of the sample dissolved in  $\text{CDCl}_3$  for collection of NMR data. If the NMR spectra of before and after irradiation of the compound are compared, an upfield shift was observed for the ortho hydrogen of the pyridine ring due to loss of conjugation. Ortho hydrogen of the 4-styrylpyridine(doublet) is the most downfield H, which shifted from  $\sim 8.6$  ppm to  $\sim 8.44$  ppm. and another new peak appeared due to the butane ring formation in the aliphatic region around  $\sim 4.39$  ppm with coupling constant 7.56 and 2.76 Hz.

1

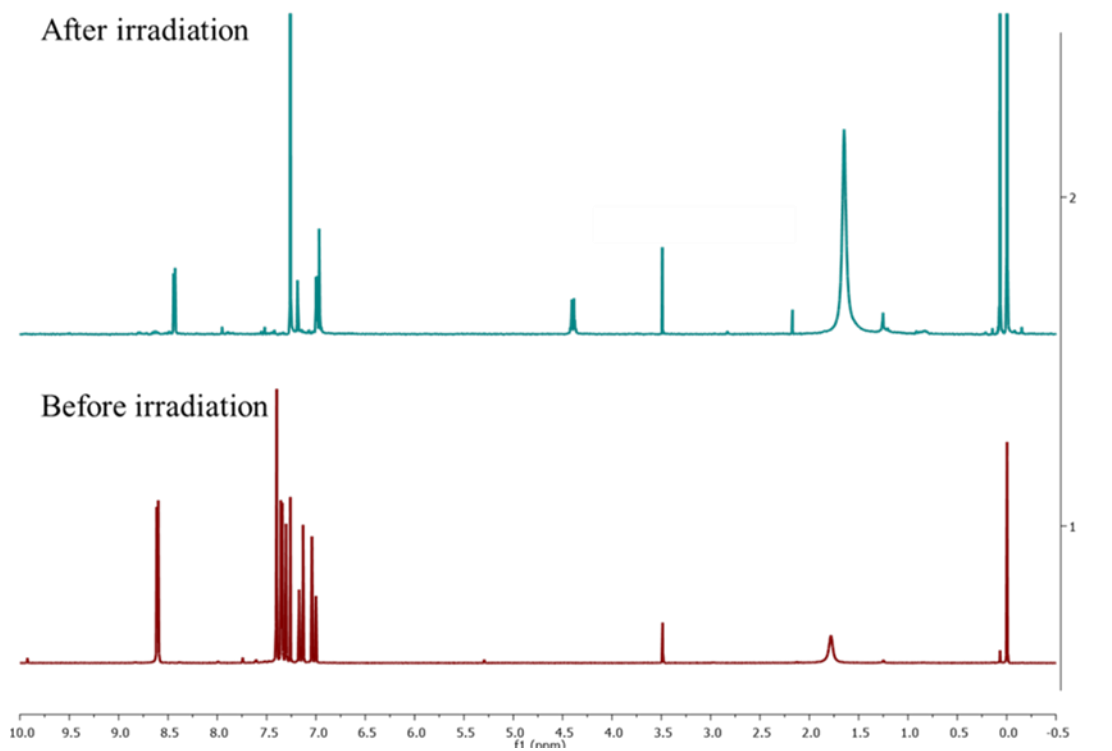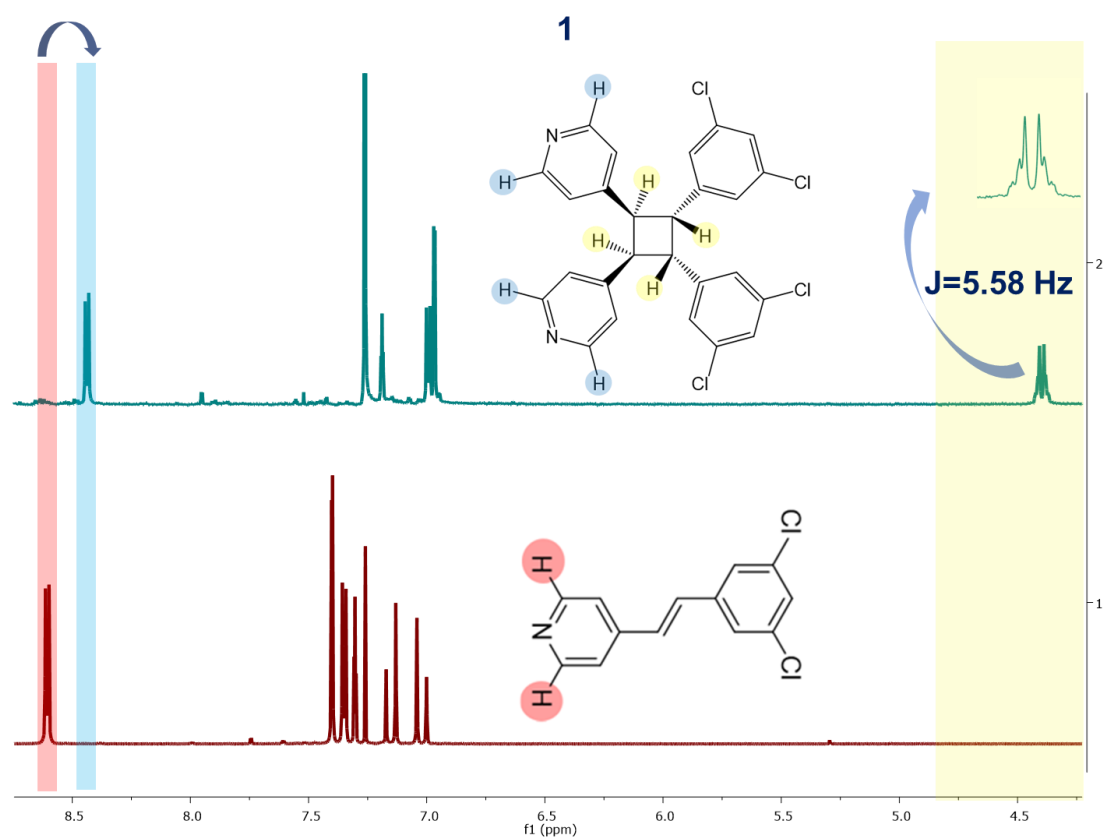

**(b)  $^1\text{H}$  NMR characterization of 1.BZA after dimerization:**

$^1\text{H}$  NMR for 1.BZA before and after UV-radiation was collected using Bruker (400 MHz) instrument. The melted crystals, after irradiation were dissolved in  $\text{CDCl}_3$ , and NMR was for the sample. The most downfield shift at 8.55 ppm was observed for the pyridine ring's ortho hydrogens, which eventually shifted to 8.44 after irradiation. The appearance of a new peak around 4.40 ppm with coupling constants 5.54 Hz and 8.84 Hz confirmed the formation of the dimer.

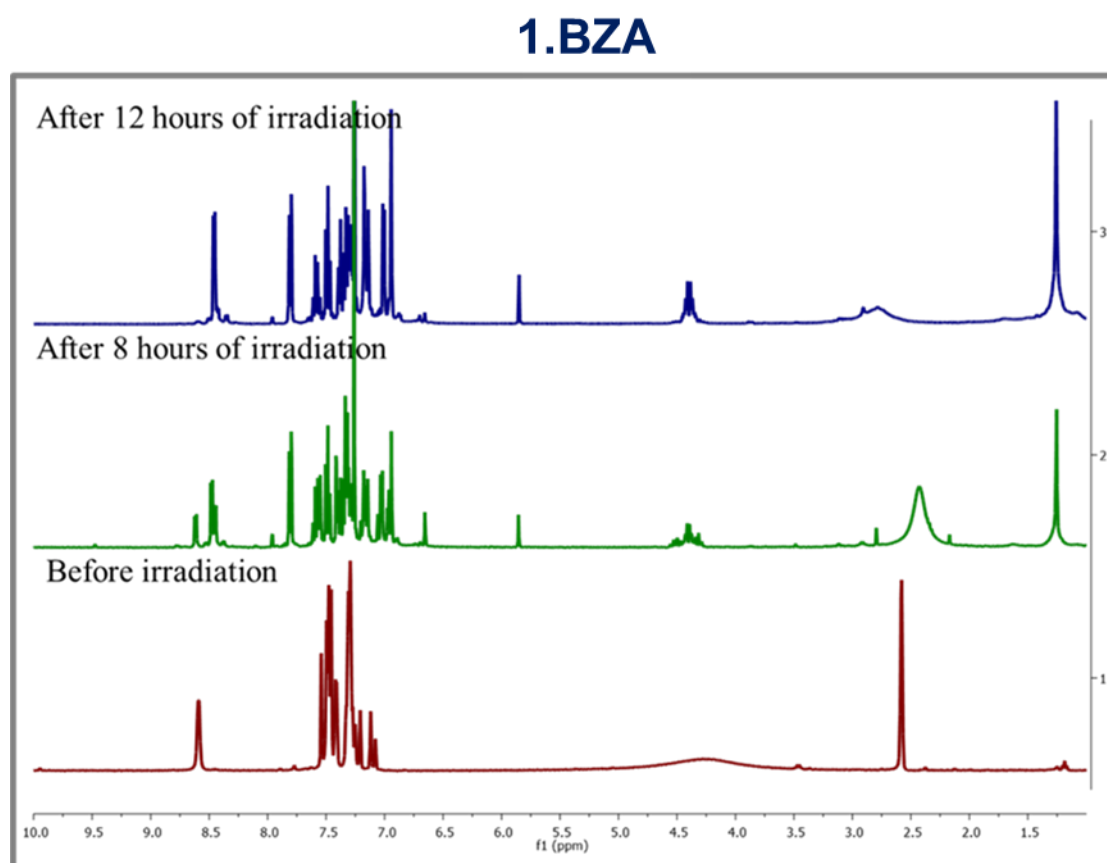

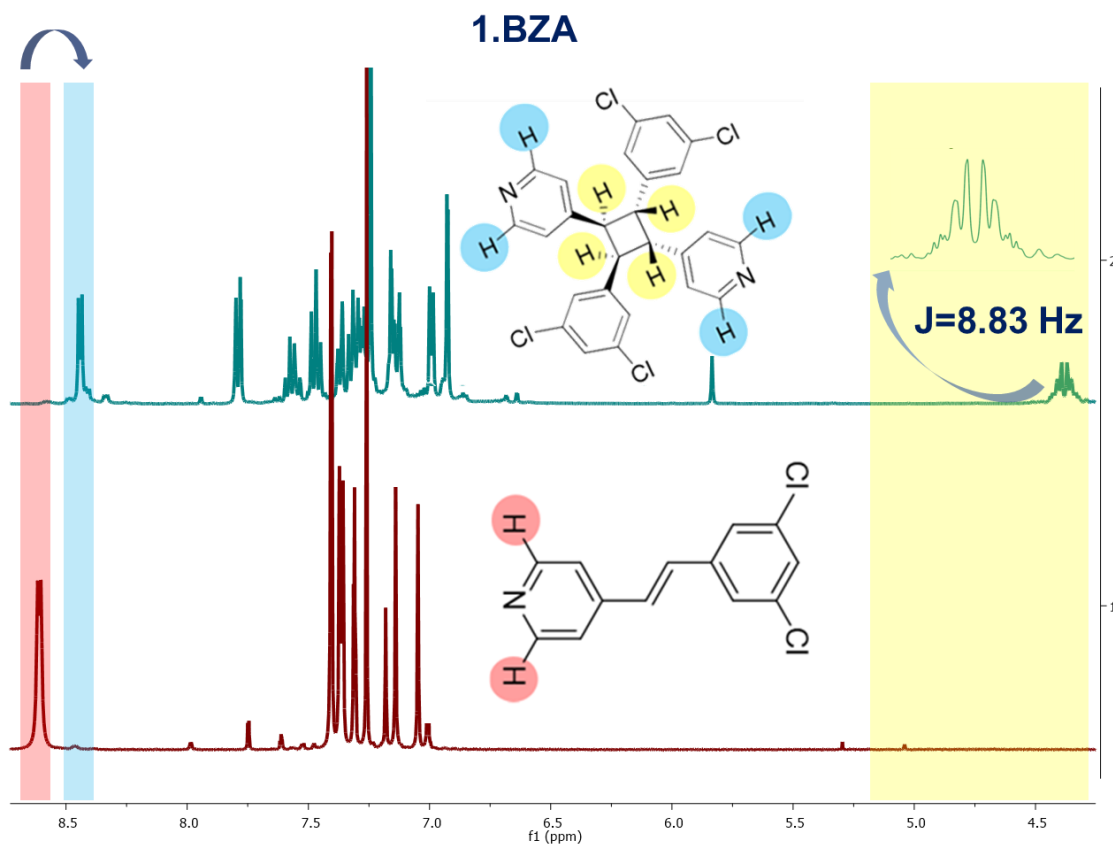

(c)  $^1\text{H}$  NMR characterization of **2** after dimerization: Melted crystals after irradiation were collected dissolving in  $\text{CDCl}_3$  using Bruker (400MHz) instrument. Observations from the NMR is discussed below:

1. After 12 hours of irradiation, peak around 8.60(d,6.15 Hz, 2H) (for the ortho hydrogens of pyridine N) did not disappear suggested incomplete conversion to the photo product.
2. Peak around 8.40 (d,6.06 4Hz, 4H) and 4.42 (m, 5.13Hz, 2.99Hz, 4H) appeared after 12 hours of irradiation. These peaks confirm the formation of dimer.
3. Along with dimer new peaks appeared around 8.46 (d, 6.12Hz, 2H) and 6.54(d,12.2Hz and 6.73(d, 12.23Hz). relative intensity of these two peaks were similar this confirms the formation of cis isomer of **2**.
4. The relative intensity of the peaks for ortho hydrogens of pyridine ring for trans isomer(2H), cis isomer(2H) and the dimer (4H) was 3.72, 2 and 4.88. When the calculation was done for the irradiated product it was obtained that 45% was unreacted, 25% was the cis isomer and 30% was the dimer product of **2**.

5. For native 2 there were two peaks around 7.02 and 7.22 ppm with coupling constant of  $\sim 16.33$  Hz. However, the new peaks around 6.54 and 6.73 ppm with coupling constant of 12.2 Hz confirms the cis isomer formation.

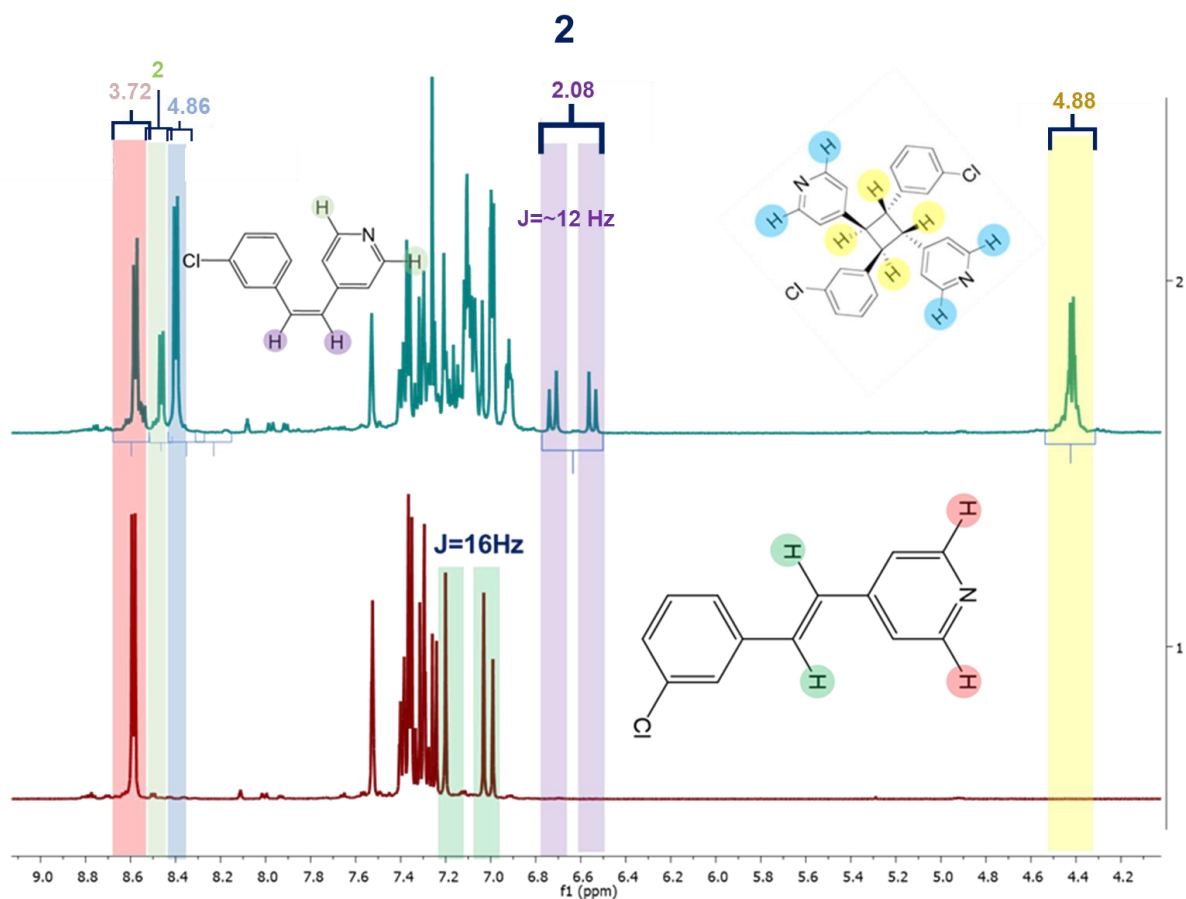

**(d)  $^1\text{H}$  NMR characterization of 2.BZA after dimerization:** The melted samples after 8 hours and 12 hours were dissolved in  $\text{CDCl}_3$  and collected the NMR. Before irradiation, a characteristic peak at 8.62 ppm was observed for ortho hydrogens of the pyridine ring. Careful observation of the NMR data after 8 hours indicates the disappearance of the peak at 8.61 ppm and the appearance of a new peak around 8.44 ppm. The peak at 8.61 ppm completely disappeared after 12 hours of irradiation, with the appearance of a new peak at 8.44 ppm and 4.45 ppm. These two characteristic features confirmed the formation of the dimer upon irradiation.



## 2.BZA

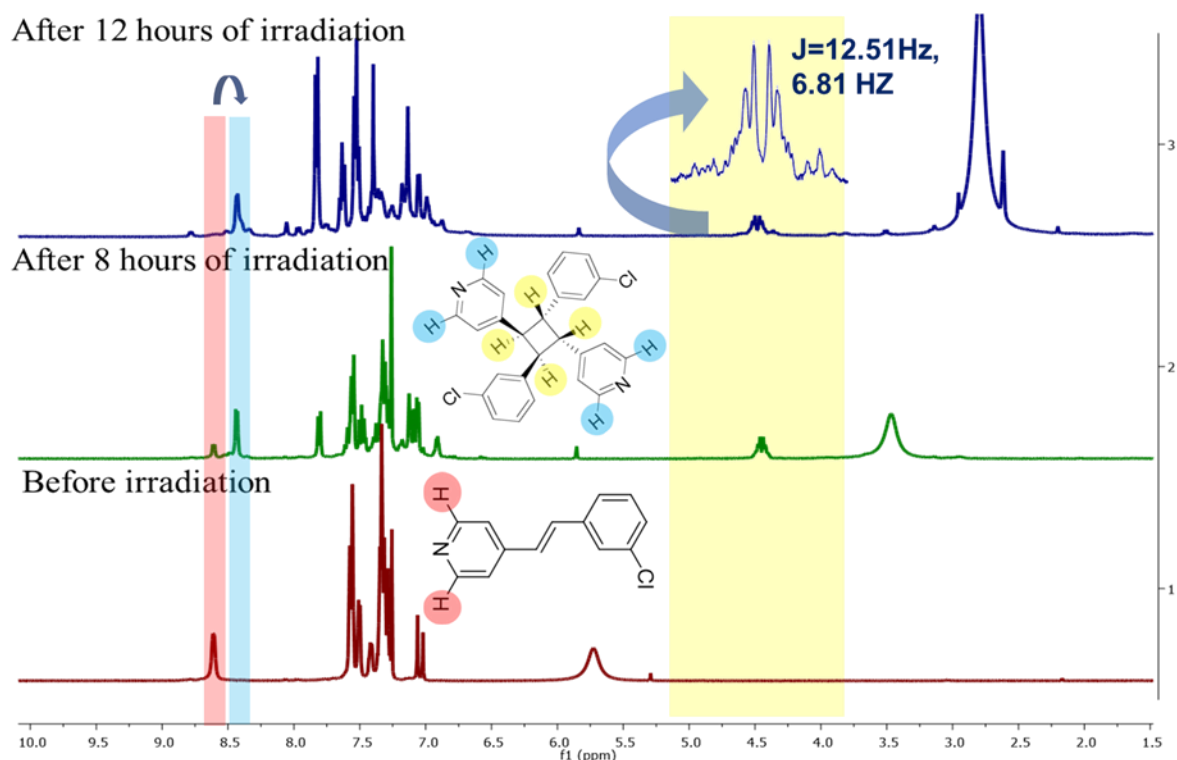

(e) **<sup>1</sup>H NMR characterization of 3 after dimerization:** Melted crystals of 3 were irradiated for 12 hours, irradiated samples were dissolved in CDCl<sub>3</sub> and NMR was collected using Bruker (400MHz) instrument. Observations obtained from the NMR is discussed below:

1. When the crystals of 3 were irradiated for 12 hours under UV lamp, peak around 8.58(d,6.31Hz, 2H) (for the ortho hydrogens of pyridine N) confirms the remaining reactant, the trans conformation of 3.
2. Peak around 8.40 (d,6.11Hz, 4H) and 4.42 (m, 4H) appeared after 12 hours of irradiation. These peaks confirm the formation of dimer.
3. Along with dimer new peaks appeared around 8.47 (d, 6.15HZ, 2H) and 6.55(d,12.25Hz and 6.72(d,12.25Hz). Relative intensity of these two peaks were similar this confirms the formation of cis isomer of 3.
4. The relative intensity of the peaks for ortho hydrogens of pyridine ring for trans isomer (2H), cis isomer(2H) and the dimer (4H) was 3.72, 2 and 4.88. When the calculation was done for the irradiated product it was obtained that 26.6 % was unreacted, 13.8% was the cis isomer and 59.6%

% was the dimer product of 3.

5. For native 3 (trans) there were two peaks around 7.02 and 7.22 ppm with coupling constant of ~16.32Hz. However, the new peaks around 6.54 and 6.73 Hz with coupling constant of 12.25 Hz confirms the cis isomer formation.

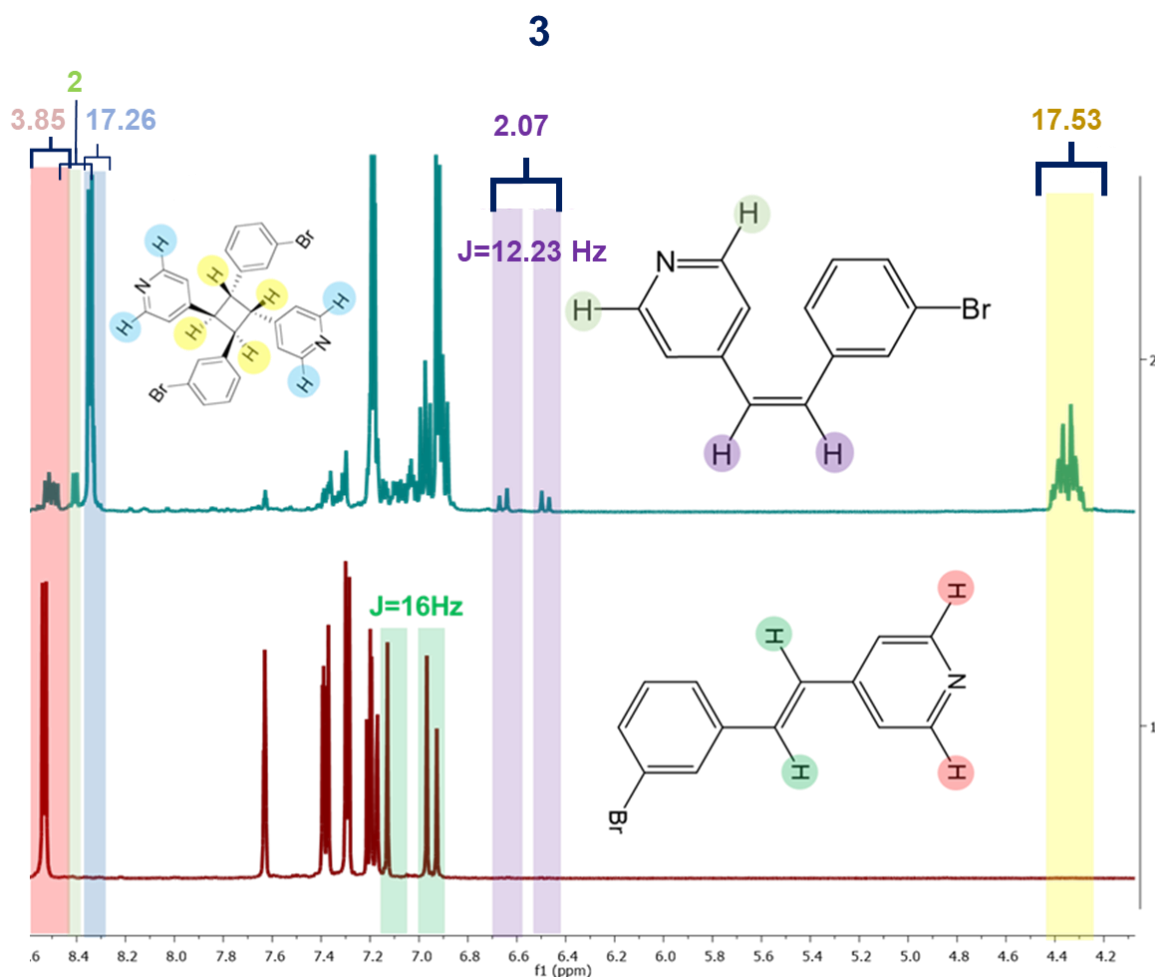

(f) **<sup>1</sup>H NMR characterization of 3.BZA after dimerization:** NMR data of the cocrystal before and after irradiation was collected. 7 mg of the cocrystal before irradiation and the melted samples after 12 hours of irradiation were dissolved in CDCl<sub>3</sub> and collected the NMR. Before irradiation, a characteristic peak at 8.6 was observed for ortho hydrogens of the pyridine ring, which shifted to 8.4 ppm after irradiation. New peaks around 4.45 ppm appeared, which confirmed the formation of the dimer.

### 3.BZA

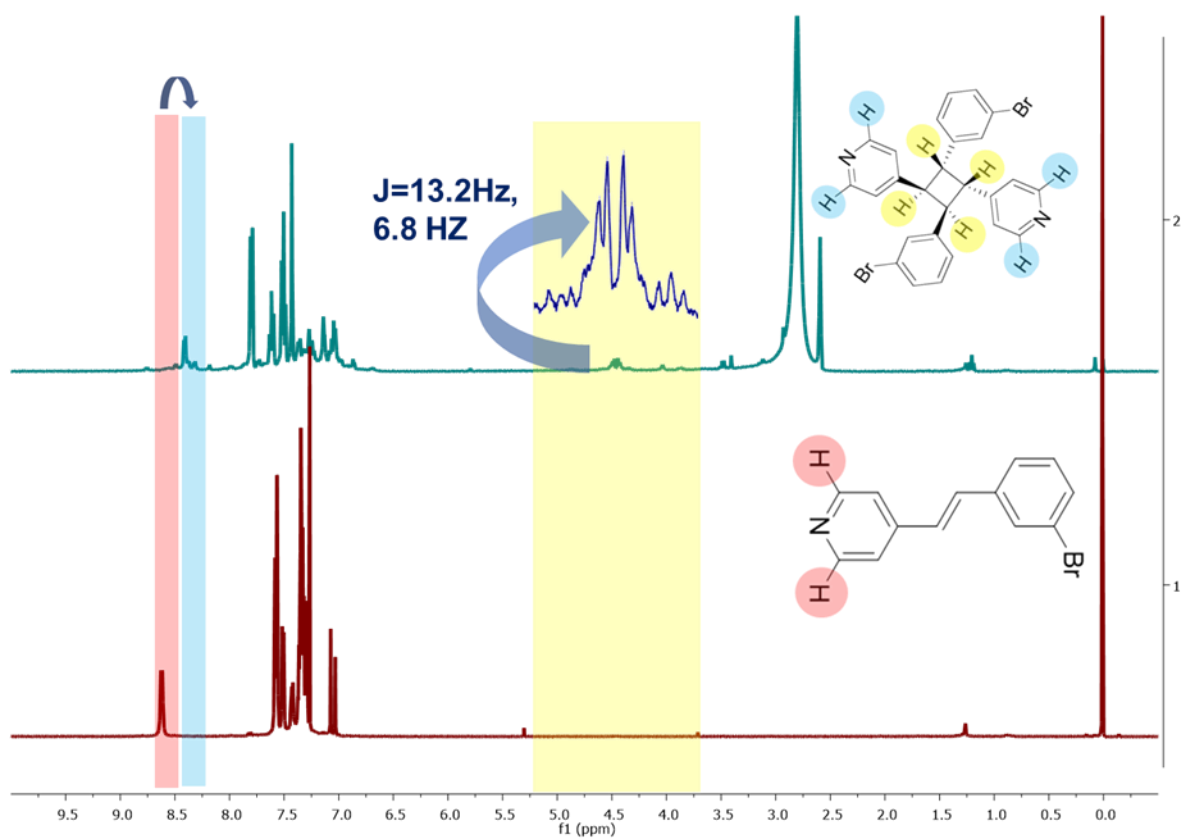

#### B. <sup>13</sup>C NMR of photodimerization.

<sup>13</sup>C NMR for the native compound and cocrystal before and after UV-radiation was collected using AV NEO (100 MHz). 7 mg of the sample before irradiation, 5 mg of sample 1, and melted form of 1.BZA were dissolved in CDCl<sub>3</sub> to collect NMR data. The appearance of new peaks around 44 ppm in the irradiated samples confirmed the dimer formation.

1

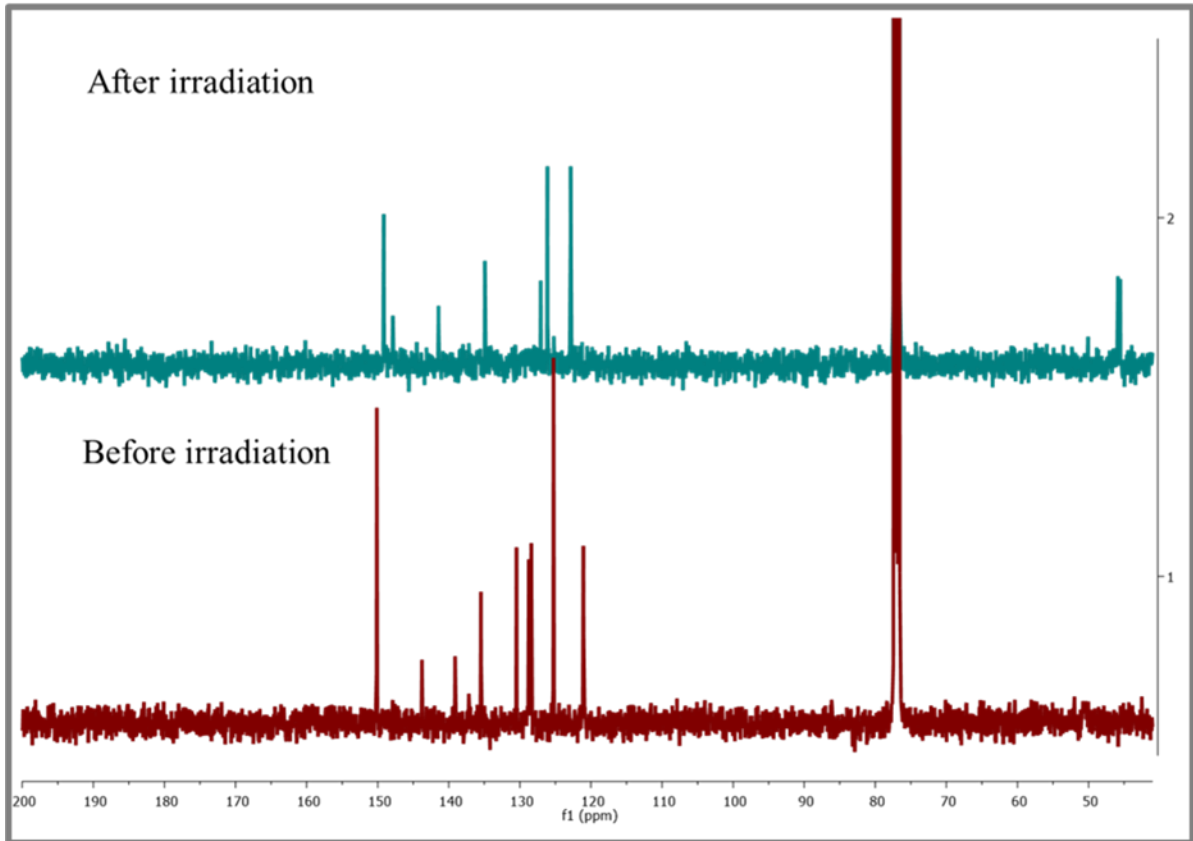

## 1.BZA

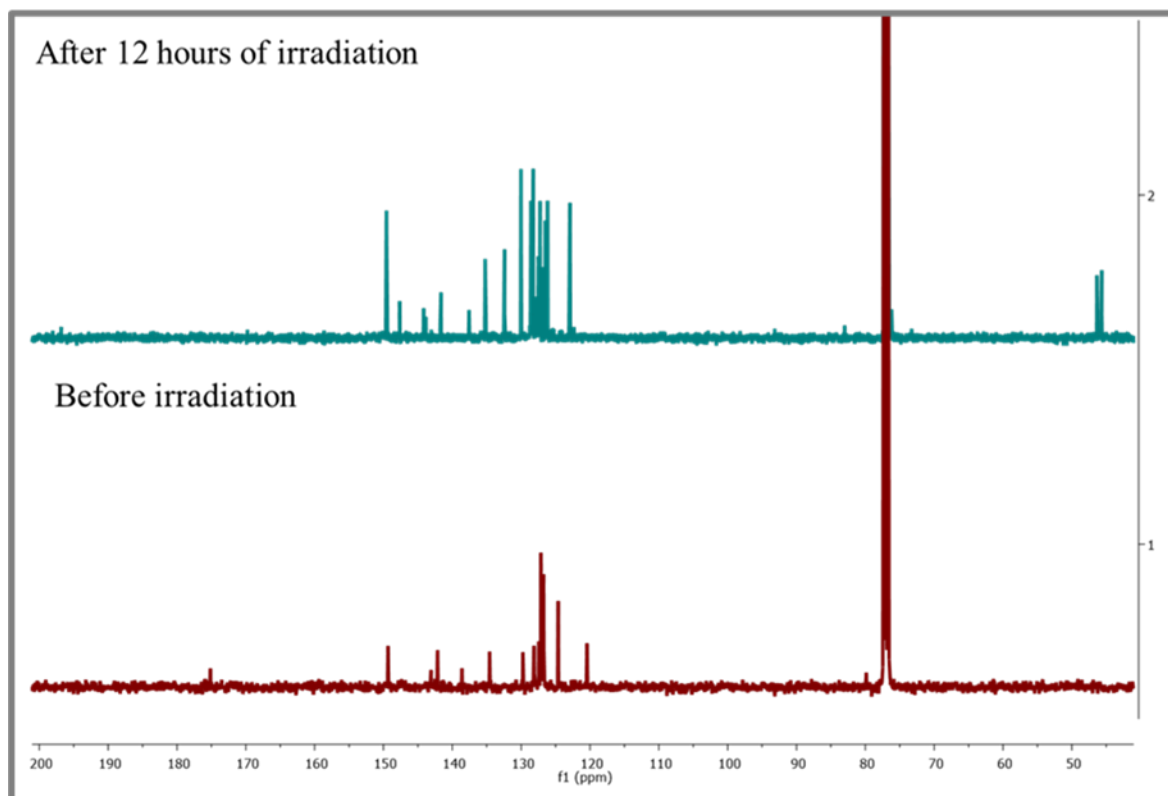

Figure 9: Stacked  $^{13}\text{C}$  NMR spectra before and after irradiation of 1 (top) 1.BZA (bottom)

### C. Mass spectra of the compound before and after irradiation:

Mass spectra of the compounds before and after irradiation were collected by dissolving a pinch of compound in methanol. The appearance of a peak at 501 in irradiated samples confirms the formation of the dimer of 1.BZA. The appearance of a new peak around 431 confirmed the formation of the dimer of 2.BZA upon irradiation and peak appearance around 520 confirmed the dimer formation of 3.BZA upon irradiation. For 1.BZA and 2.BZA, another peak around 432 and 400, appeared with an abundance of nearly 50 % after dimerization. These two peaks in the respective structures come due to the  $\alpha$ -cleavage of two chlorine atoms in 1.BZA and  $\alpha$ -cleavage of 1 chlorine atom in 2.BZA.

### 1.BZA

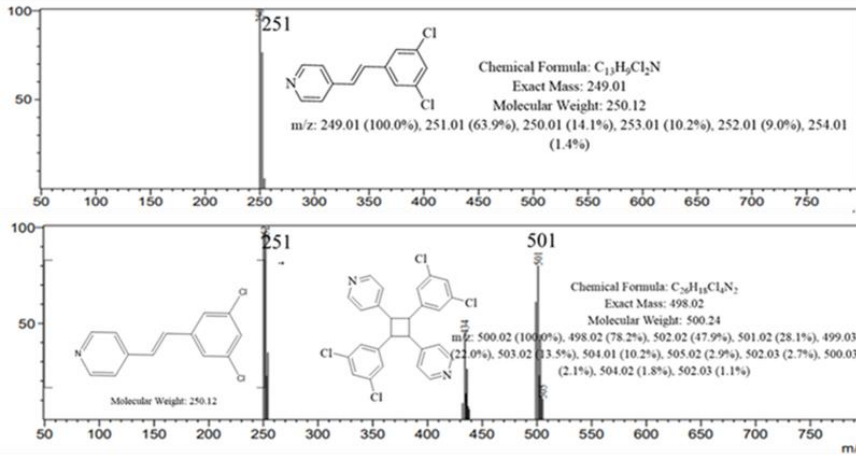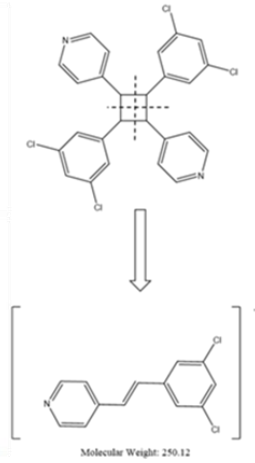

### 2.BZA

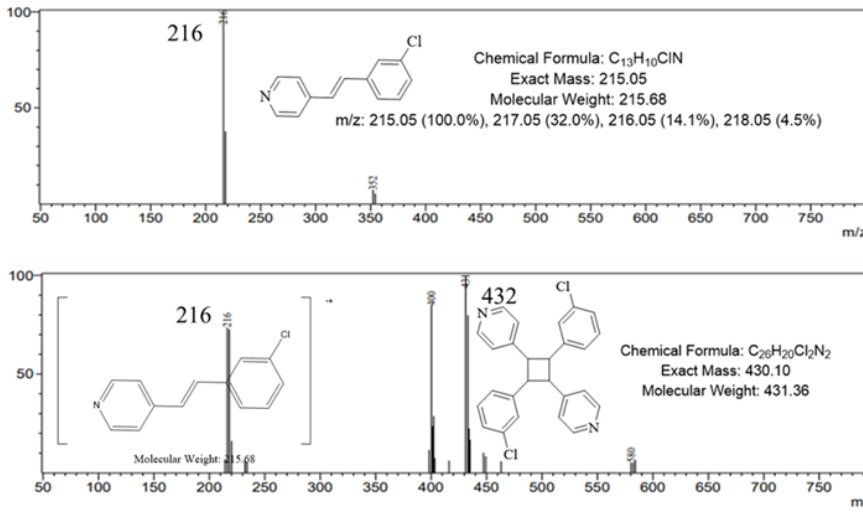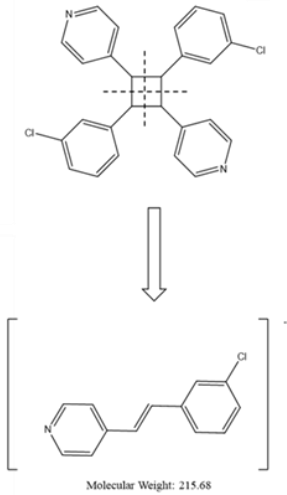

### 3.BZA

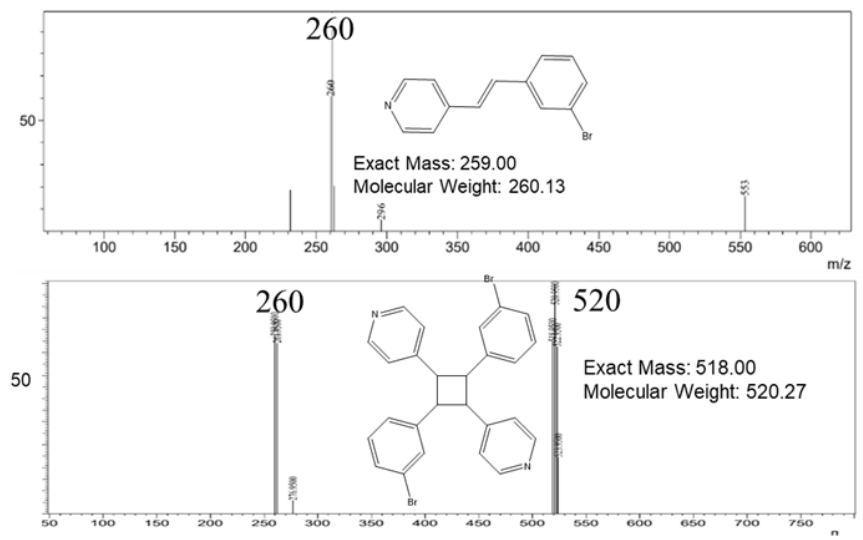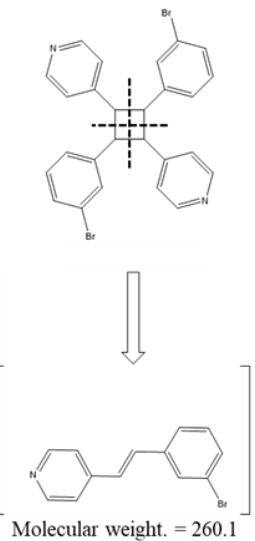

Figure 10: Stacked Mass spectra before and after irradiation of 1.BZA., 2.BZA, and 3.BZA. The fragmentation is shown in the right, defining the appearance of two significant peaks after irradiation.

### S12. Response to A and B alerts:

# start Validation Reply Form for **2.BZA**

\_vrf\_PLAT353\_exp\_1320\_am-r-135-can;

PROBLEM: Long N-H (N0.87,N1.01A) N5 - H2 . 1.10 Ang.

RESPONSE: ... $\Delta pK_a$  calculation results for the system indicate possible salt formation.

Therefore, the N-H bond length was higher than the normal bond length, that is why this B alert was generated.

\_vrf\_PLAT772\_exp\_1320\_am-r-135-acn;

PROBLEM: Suspect O-H Bond in CIF: O2 --H2 .. 1.46 Ang.

RESPONSE: ... $\Delta pK_a$  calculation results for the system indicate possible salt formation. For that reason, it showed a possibility of O-H bond formation. Due to this reason, this B alert was generated.

# end Validation Reply Form

### S13. ORTEP Diagrams:

ORTEP diagrams were created using a 50% probability.

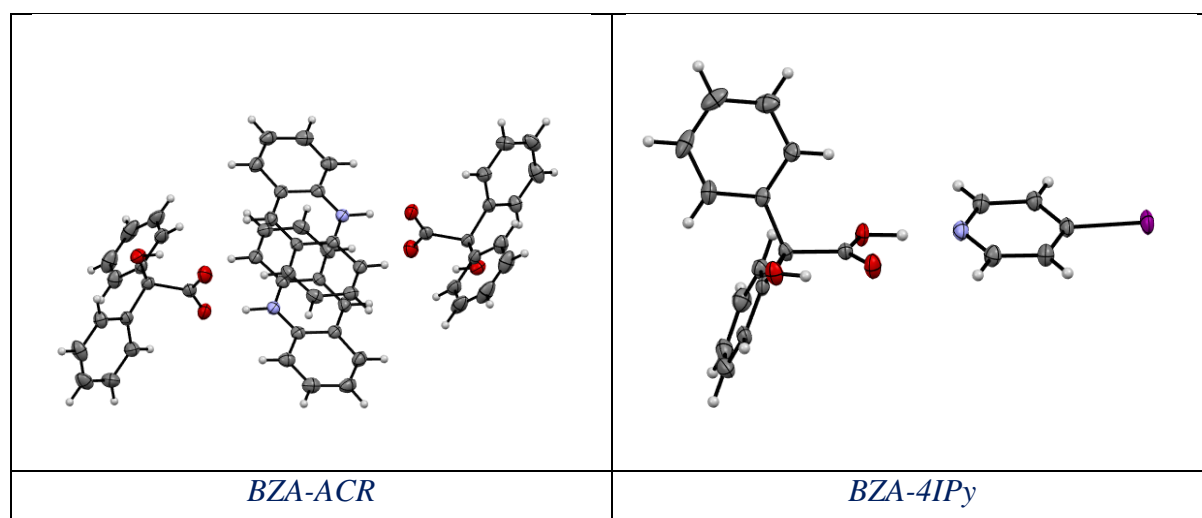

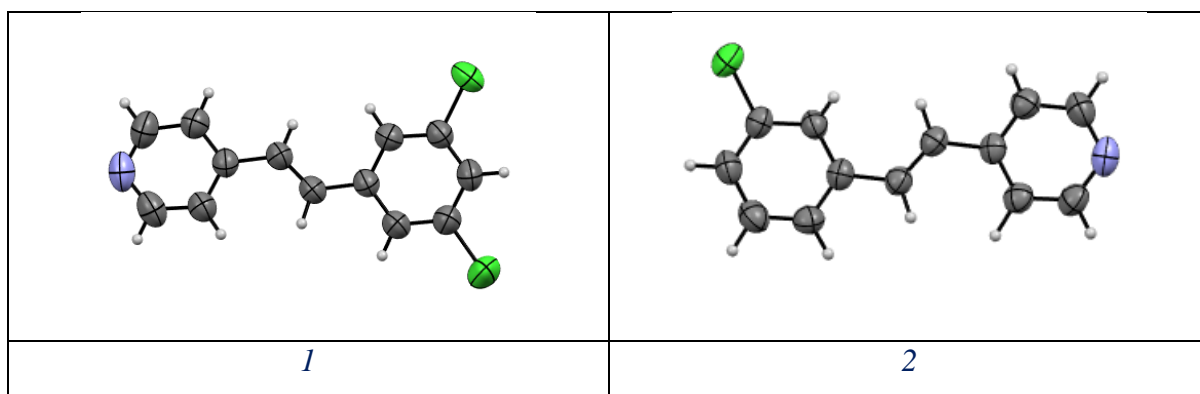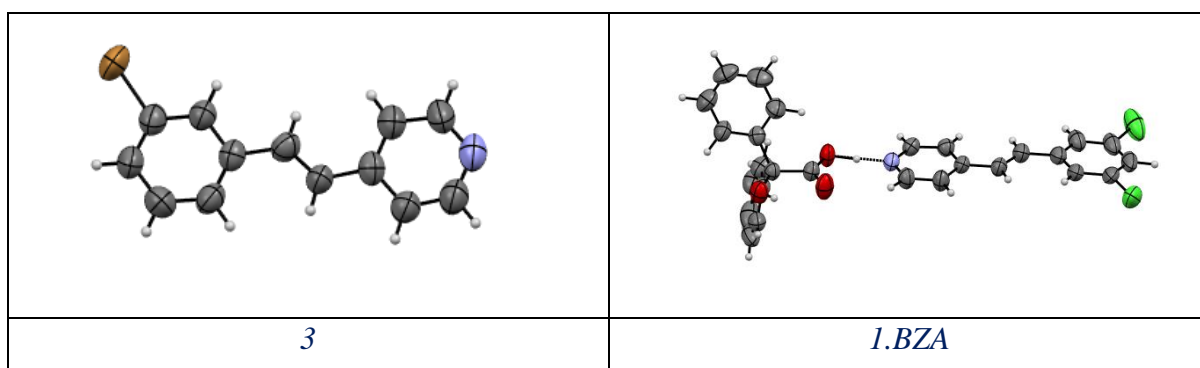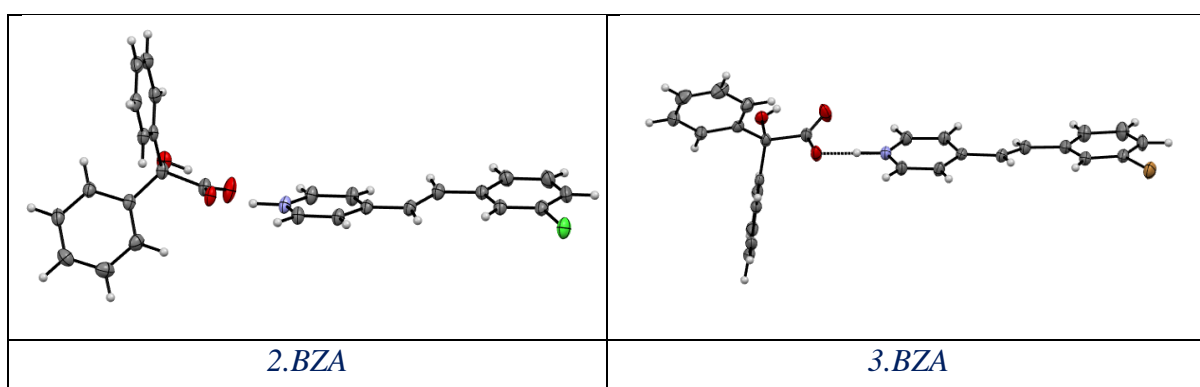

## References:

- 1 A. I. Vogel and B. S. Furniss, *Vogel's Textbook of practical organic chemistry*, Longman Scientific & Technical ; Wiley London, New York, London, New York, 5th ed., 1989.
- 2 J. L. R. Williams, R. E. Adel, J. M. Carlson, G. A. Reynolds, D. G. Borden and J. A. Ford, *J. Org. Chem.*, 1963, **28**, 387–390.
- 3 B. R. Bhogala, B. Captain, A. Parthasarathy and V. Ramamurthy, *J. Am. Chem. Soc.*, 2010, **132**, 13434–13442.
- 4 E. Elacqua, P. Kaushik, R. H. Groeneman, J. C. Sumrak, D.-K. Bučar and L. R. MacGillivray, *Angew. Chem. Int. Ed.*, 2012, **51**, 1037–1041.
- 5 E. Elacqua, K. A. Kummer, R. H. Groeneman, E. W. Reinheimer and L. R. MacGillivray, *J. Photochem. Photobiol. Chem.*, 2016, **331**, 42–47.



- 6 B. R. Bhogala, B. Captain and V. Ramamurthy, *Photochem. Photobiol.*, 2015, **91**, 696–704.
- 7 M. A. Sinnwell, R. H. Groeneman, B. J. Ingenthron, C. Li and L. R. MacGillivray, *Commun. Chem.*, 2021, **4**, 60.
- 8 S. Dutta, D.-K. Bučar and L. R. MacGillivray, *Org. Lett.*, 2011, **13**, 2260–2262.
- 9 D.-K. Bučar, A. Sen, S. V. S. Mariappan and L. R. MacGillivray, *Chem. Commun.*, 2012, **48**, 1790.
- 10 E. Bosch, S. J. Kruse, E. W. Reinheimer, N. P. Rath and R. H. Groeneman, *CrystEngComm*, 2019, **21**, 6671–6675.
- 11 S. M. Oburn, M. A. Sinnwell, D. P. Ericson, E. W. Reinheimer, D. M. Proserpio, R. H. Groeneman and L. MacGillivray, *IUCrJ*, 2019, **6**, 1032–1039.
- 12 A. L. Grobelny, N. P. Rath and R. H. Groeneman, *Photochem. Photobiol. Sci.*, 2019, **18**, 989–992.
- 13 A. L. Grobelny, N. P. Rath and R. H. Groeneman, *CrystEngComm*, 2018, **20**, 3951–3954.
- 14 G. Campillo-Alvarado, K. P. D’mello, D. C. Swenson, S. V. Santhana Mariappan, H. Höpfl, H. Morales-Rojas and L. R. MacGillivray, *Angew. Chem. Int. Ed.*, 2019, **58**, 5413–5416.
- 15 G. Campillo-Alvarado, C. Li, Z. Feng, K. M. Hutchins, D. C. Swenson, H. Höpfl, H. Morales-Rojas and L. R. MacGillivray, *Organometallics*, 2020, **39**, 2197–2201.
- 16 L. R. MacGillivray, J. L. Reid and J. A. Ripmeester, *J. Am. Chem. Soc.*, 2000, **122**, 7817–7818.
- 17 G. Ortega, J. Hernández, T. González, R. Dorta and A. Briceño, *Photochem. Photobiol. Sci.*, 2018, **17**, 670–680.
- 18 S. Li and D. Yan, *ACS Appl. Mater. Interfaces*, 2018, **10**, 22703–22710.
- 19 S. Li, B. Lu, X. Fang and D. Yan, *Angew. Chem. Int. Ed.*, 2020, **59**, 22623–22630.
- 20 S. P. Yelgaonkar, D. Kiani, J. Baltrusaitis and L. R. MacGillivray, *Chem. Commun.*, 2020, **56**, 6708–6710.
- 21 T. B. Nguyen, T. M. Nguyen and P. Retailleau, *Chem. – Eur. J.*, 2020, **26**, 4682–4689.
- 22 C. Li, G. Campillo-Alvarado, D. C. Swenson and L. R. MacGillivray, *CrystEngComm*, 2021, **23**, 1071–1074.
- 23 A. J. Cruz-Cabeza, M. Lusi, H. P. Wheatcroft and A. D. Bond, *Faraday Discuss.*, 2022, **235**, 446–466.
- 24 L. J. Farrugia, *J. Appl. Crystallogr.*, 1999, **32**, 837–838.
- 25 P. R. Spackman, M. J. Turner, J. J. McKinnon, S. K. Wolff, D. J. Grimwood, D. Jayatilaka and M. A. Spackman, *J. Appl. Crystallogr.*, 2021, **54**, 1006–1011.
- 26 C. F. Macrae, I. Sovago, S. J. Cottrell, P. T. A. Galek, P. McCabe, E. Pidcock, M. Platings, G. P. Shields, J. S. Stevens, M. Towler and P. A. Wood, *J. Appl. Crystallogr.*, 2020, **53**, 226–235.
